# Supplementary material
Source: MDPI journal article supplement (https://www.mdpi.com/2673-6004/4/4/29)
Supplement: s1 [file s1]

**Supplementary Information S6: Presence locations of Common Cranes (1&2) and Demoiselle Cranes (1&2) plotted on the land use land cover map of the study area.**

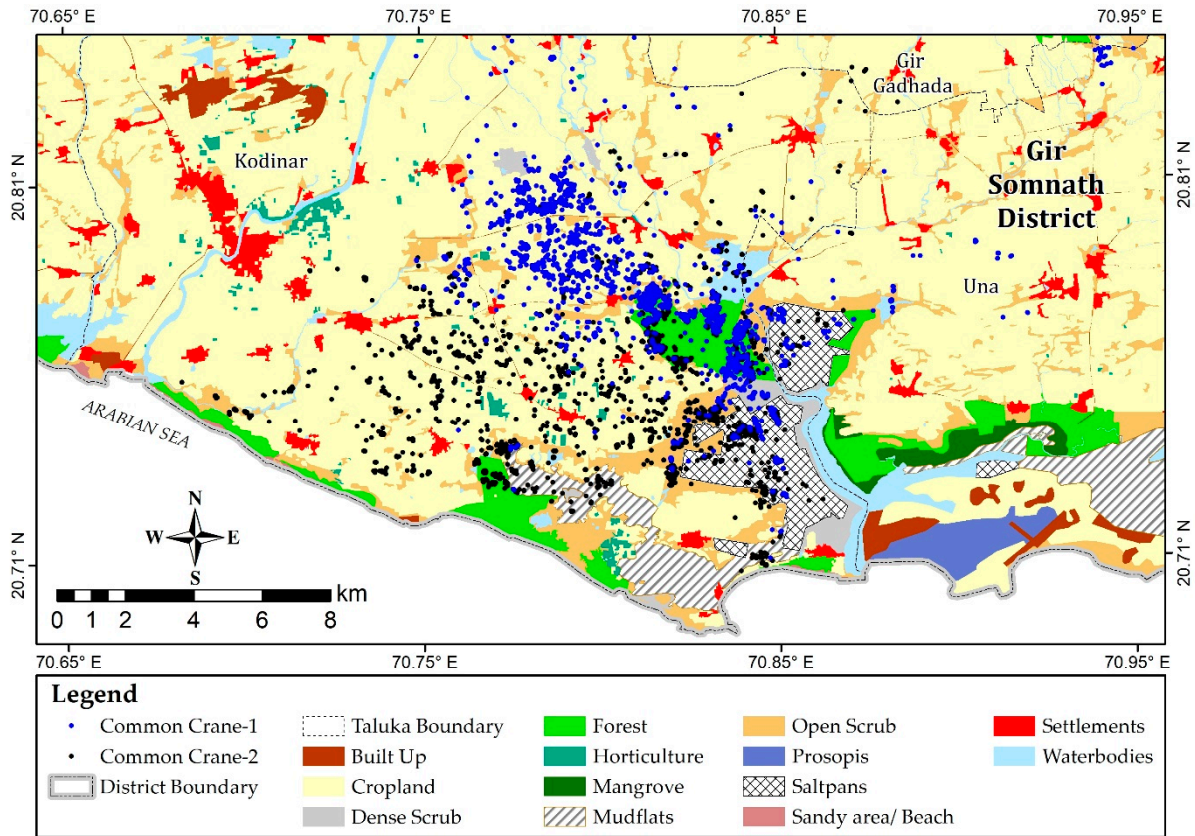

**Fig 1 Presence locations of Common Crane-1 and Common Crane-2 in Gir-Somnath district, Gujarat, India.**

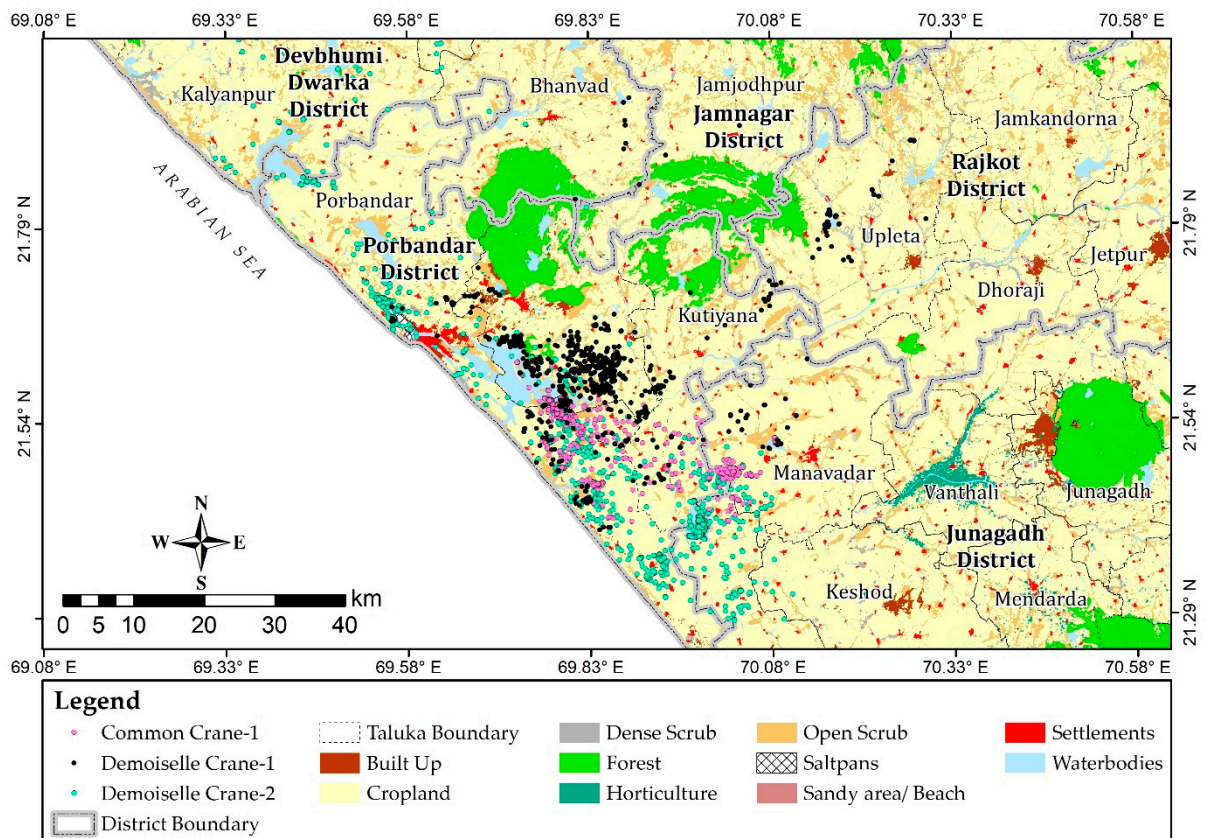

**Fig 2 Presence locations of Common Crane-1, Demoiselle Crane-1, and Demoiselle Crane-2 in Porbandar district, Gujarat, India.**

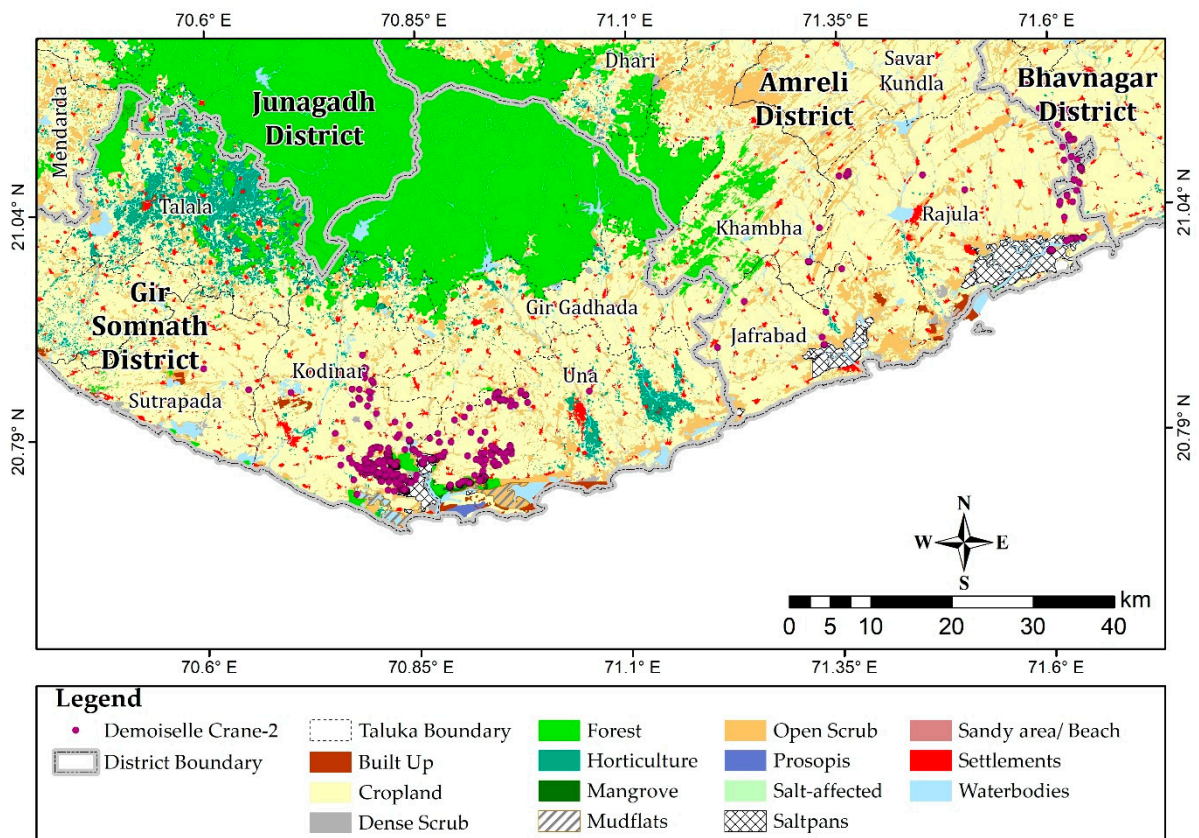

**Fig 3 Presence locations of Demoiselle Crane-2 in Gir-Somnath district, Gujarat, India.**



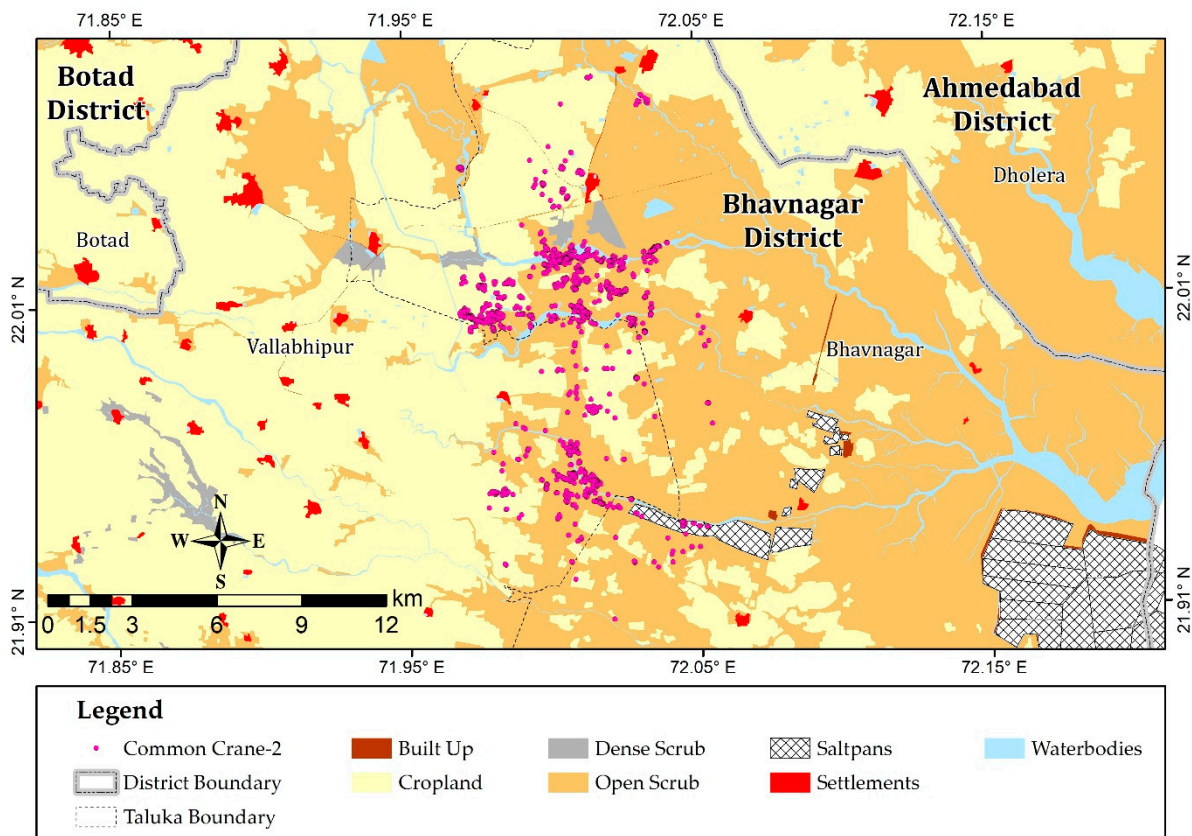

**Fig 4 Presence locations of Common Crane-2 in Bhavnagar district, Gujarat, India.**

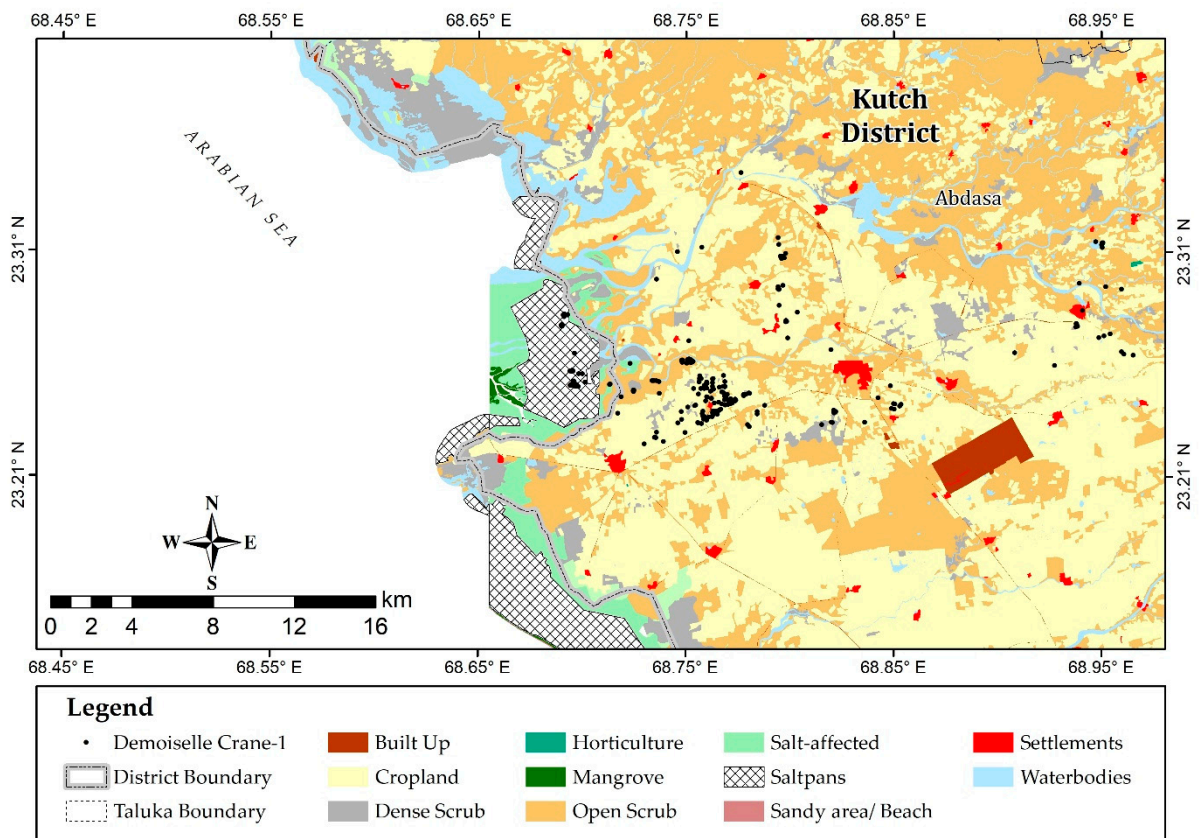

**Fig 5 Presence locations of Demoiselle Crane-1 in Kutch district, Gujarat, India.**

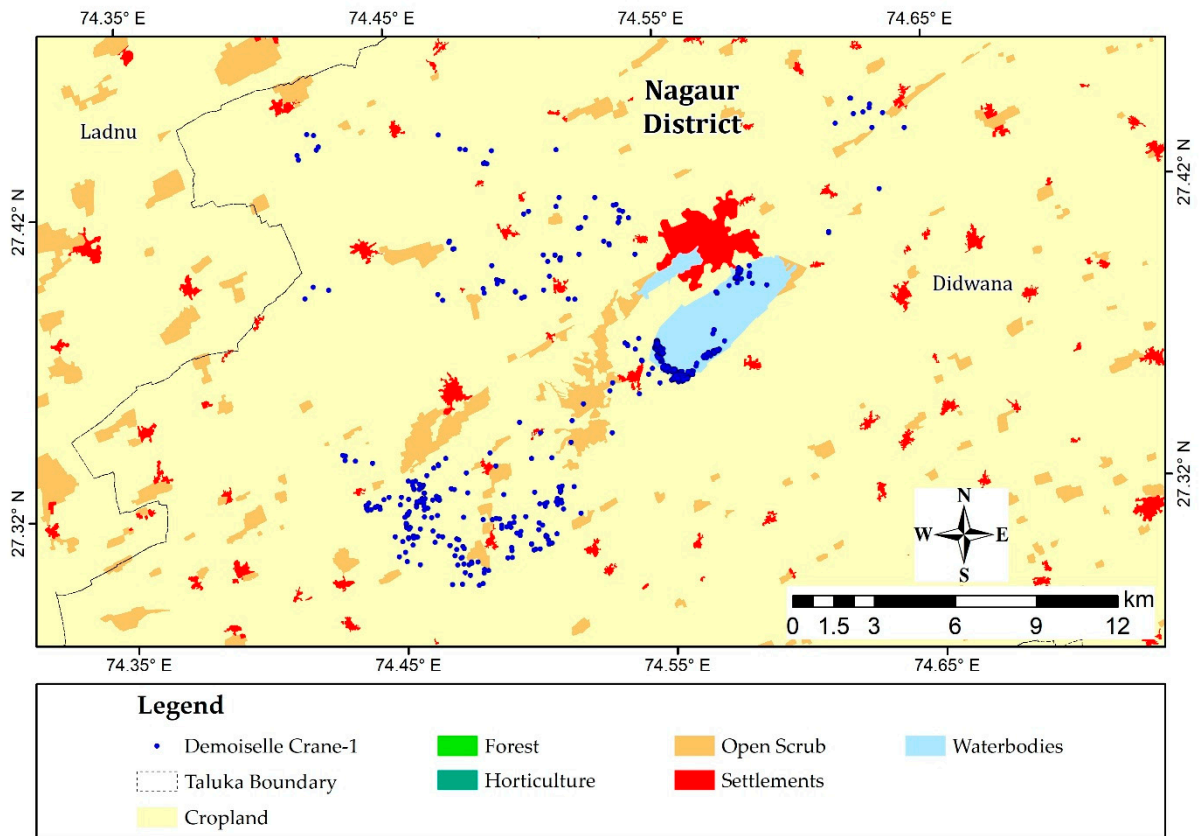

**Fig 6 Presence locations of Demoiselle Crane-1 in the Nagaur district of the north western state of Rajasthan, India**

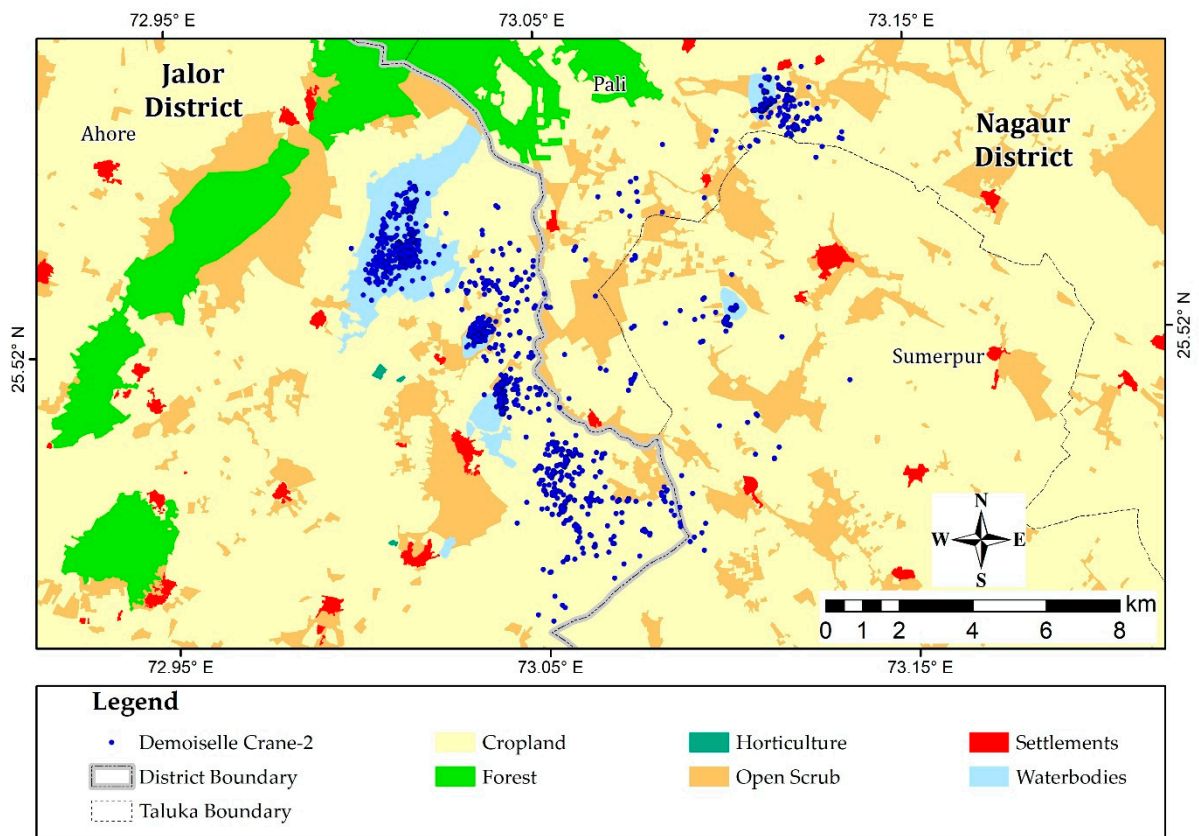

**Fig 7 Presence locations of Demoiselle Crane-2 in the Nagaur district of the north western state of Rajasthan, India**
