# Supplementary material
Source: MDPI journal article supplement (https://www.mdpi.com/2673-6004/4/4/29)
Supplement: s1 [file s1]

**Supplementary Information S1: Details of satellite tagging of Common Cranes and Demoiselle Cranes carried out in Gir-Somnath landscape, Gujarat, India**

| <b>Species</b>     | <b>Date of Tagging</b> | <b>Tag No.</b> | <b>Time of Tagging (LMT)</b> | <b>Time of Tagging (UTC)</b> | <b>Place of Tagging</b>   | <b>Type of Tag</b> | <b>Weight of Tag (in grams)</b> |
|--------------------|------------------------|----------------|------------------------------|------------------------------|---------------------------|--------------------|---------------------------------|
| Common Crane-1     | 26/01/2022             | 215643         | 17:40                        | 12:10                        | Nana Vada Wetland Kodinar | Ornitella GSM Tag  | R-19                            |
| Common Crane-2     | 04/02/2022             | 215644         | 17:40                        | 12:10                        |                           | Ornitella GSM Tag  | R-19                            |
| Demoiselle Crane-1 | 31/01/2022             | 215645         | 17:00                        | 11:30                        |                           | Ornitella GSM Tag  | R-19                            |
| Demoiselle Crane-2 | 07/02/2022             | 215646         | 17:00                        | 11:30                        |                           | Ornitella GSM Tag  | R-19                            |

## Photographs of the complete tagging and release method

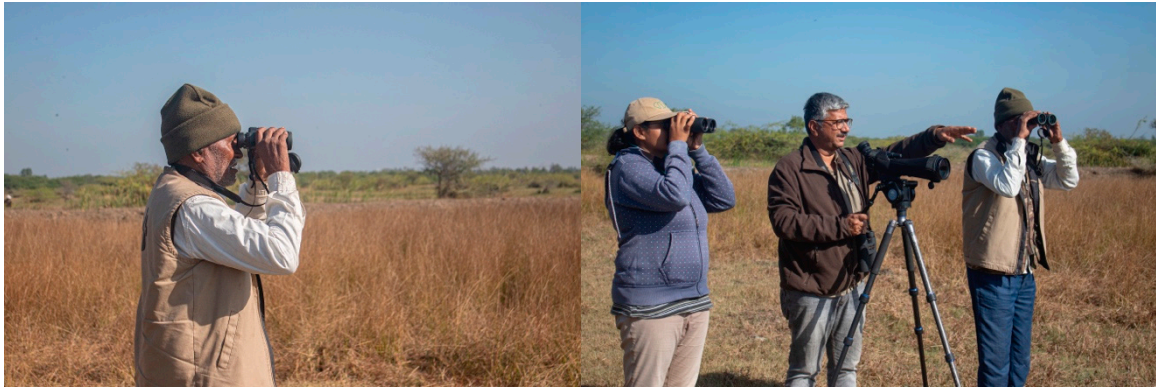

**Reconnaissance survey by the team at the targeted trapping site**

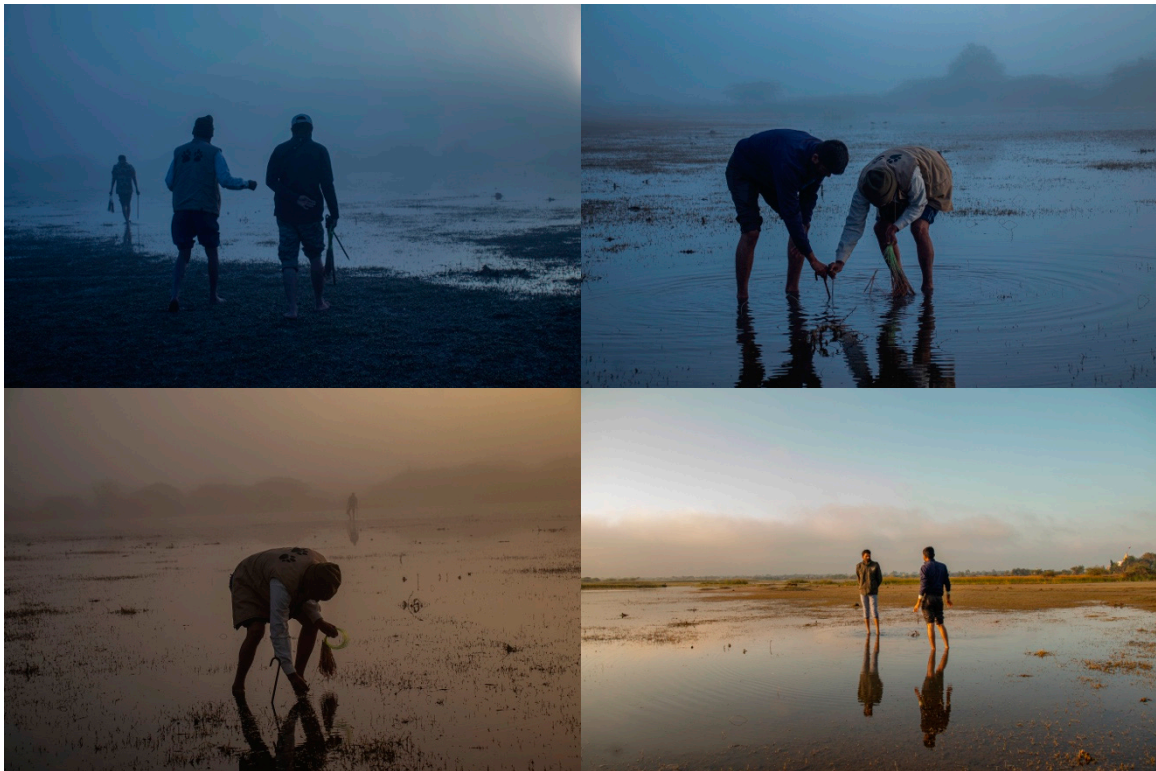

**Team deploying noose traps before dawn.**

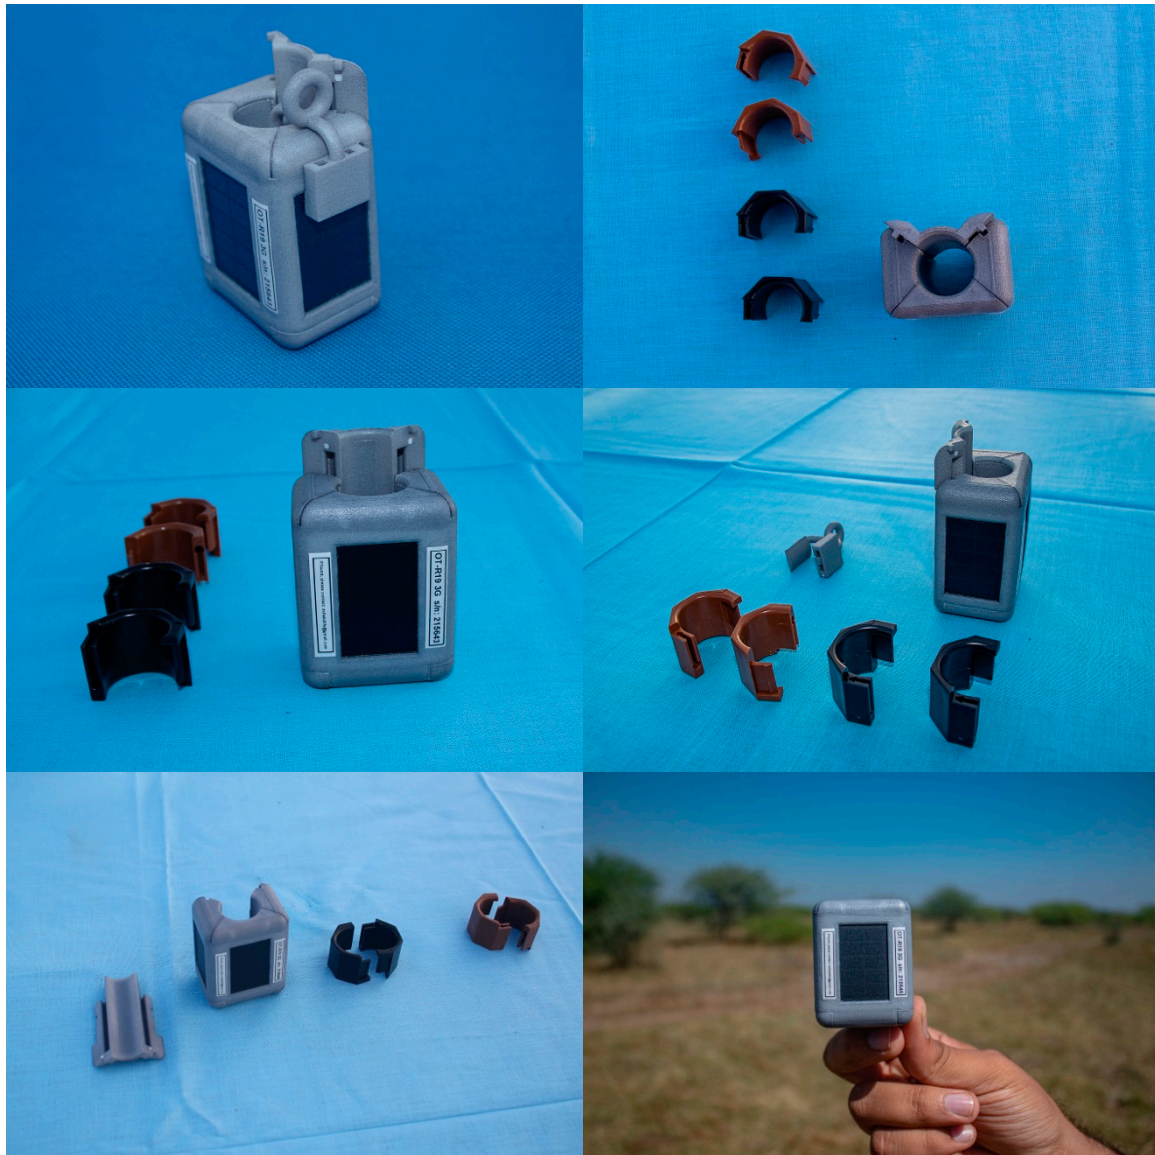

**All side view of the leg-mount transmitter, along with the coloured ELSA (European Laser-Signed Advanced) rings**



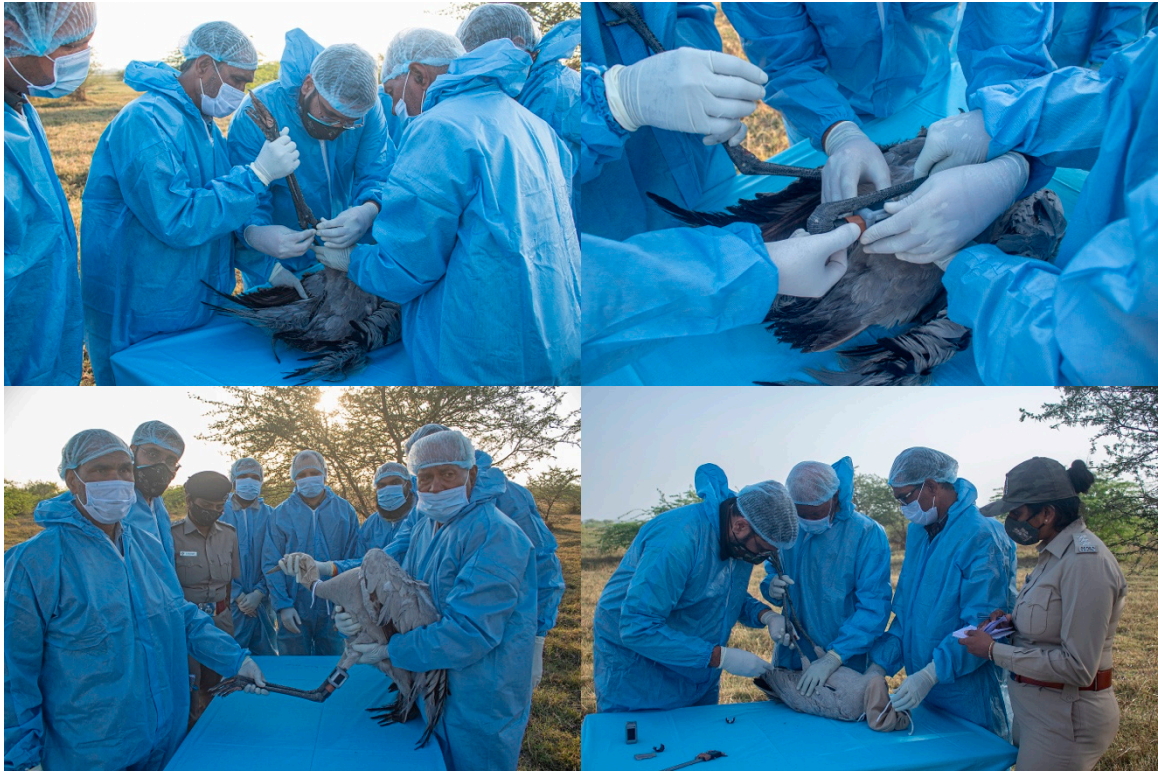

**Common Cranes being deployed with leg-mount transmitters and coloured ELSA rings**

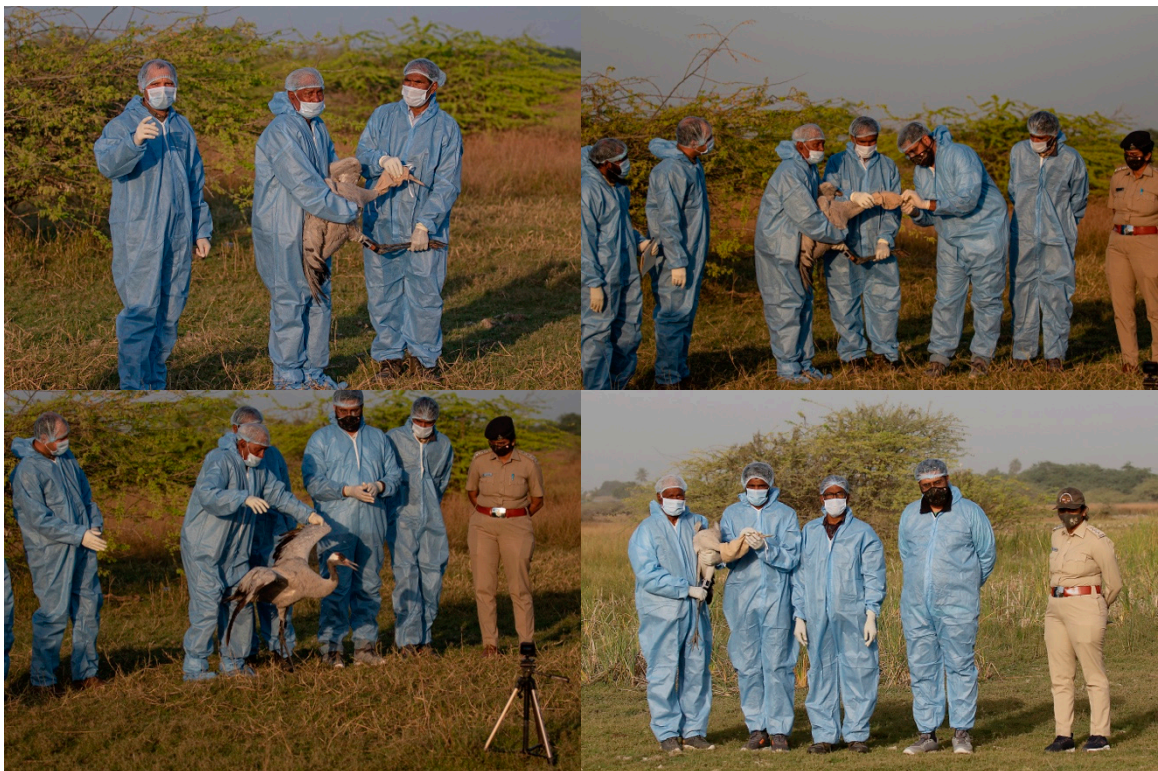

**The team preparing for the release of tagged Common Cranes**



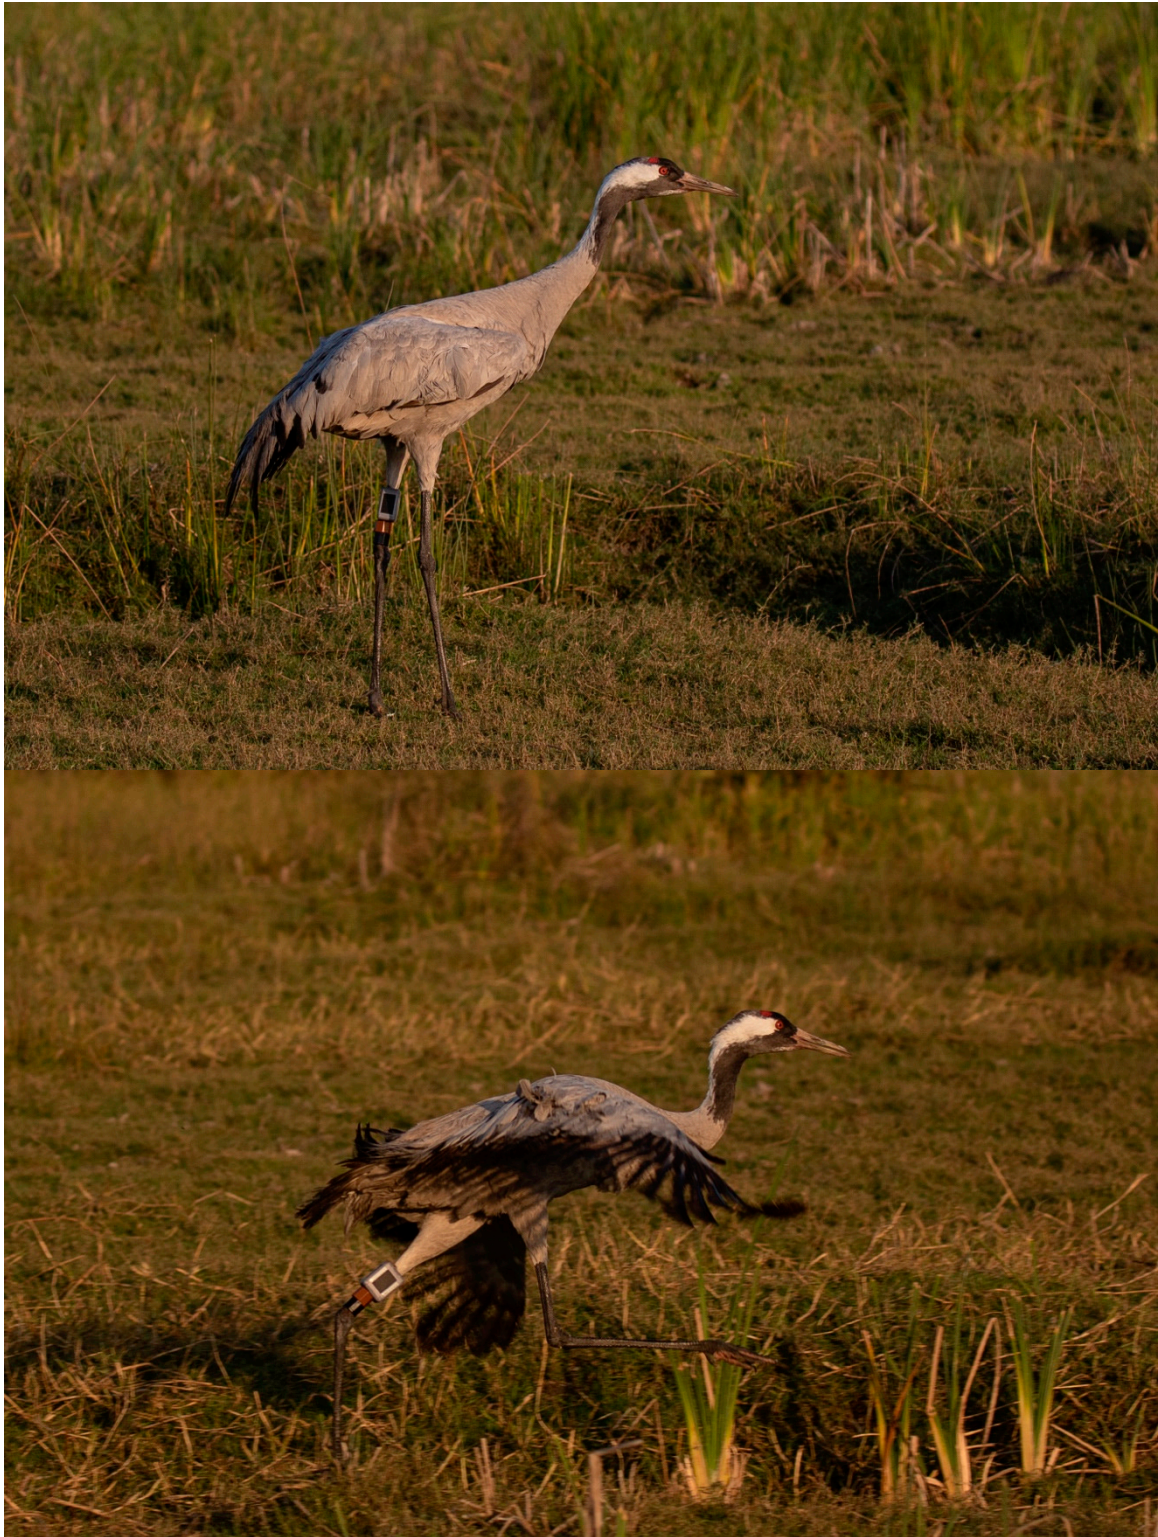

**The successful release of tagged Common Crane – 1.**



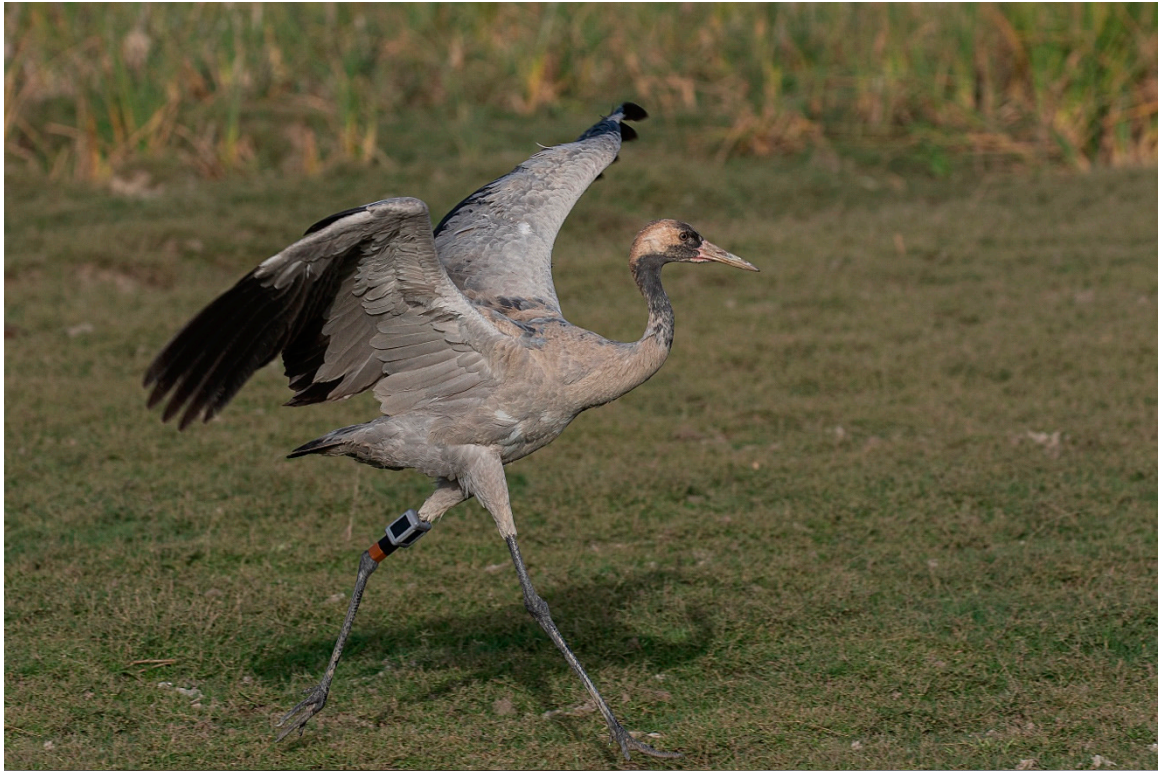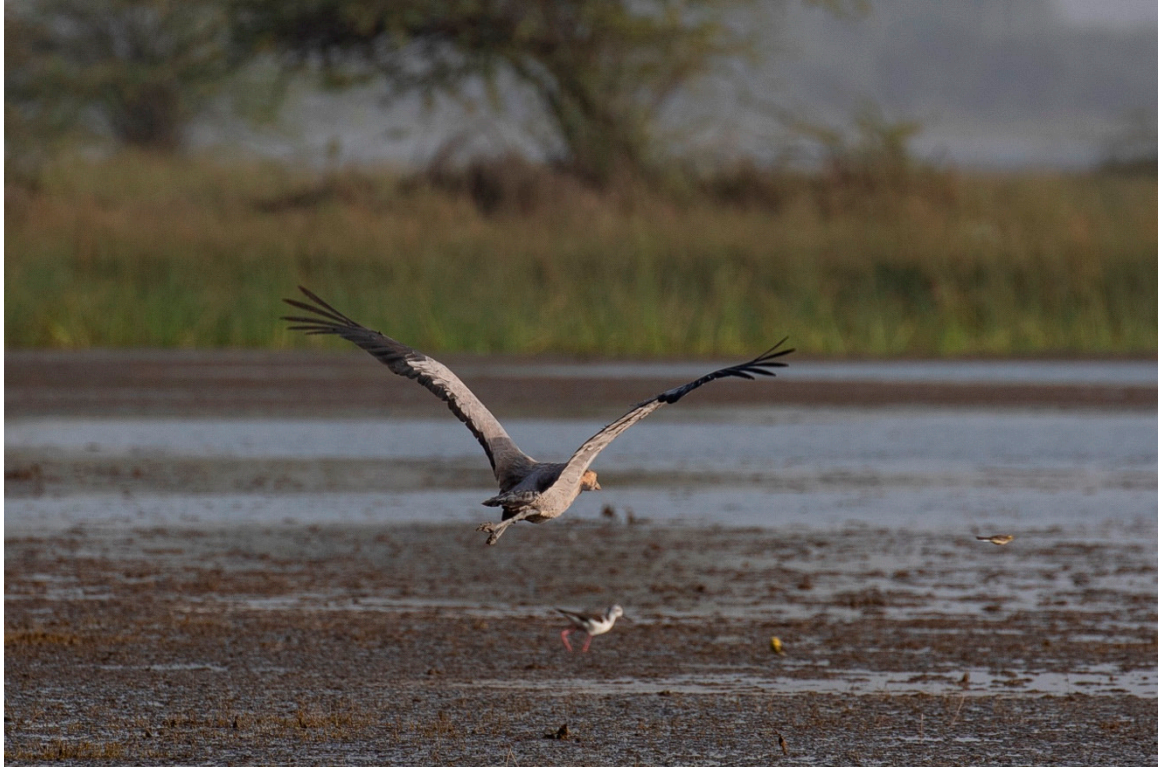

**The successful release of tagged Common Crane – 2**



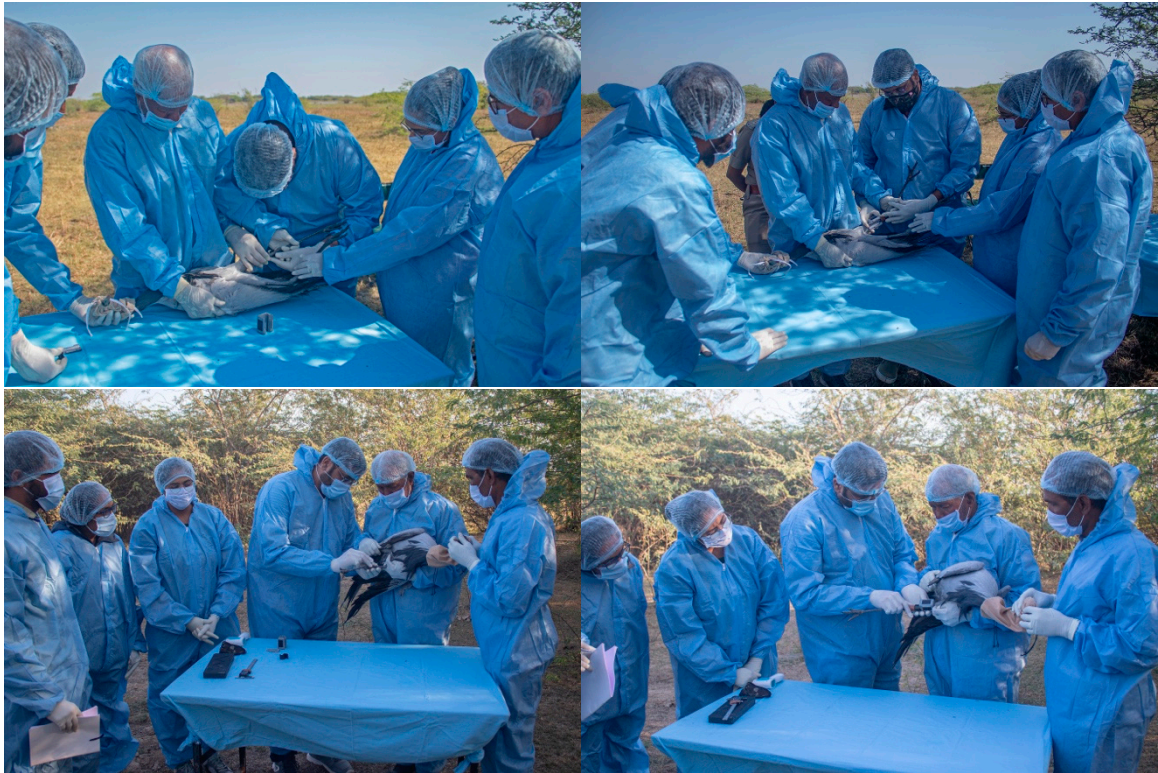

**Demoiselle Cranes being deployed with leg-mount transmitters and coloured ELSA rings.**

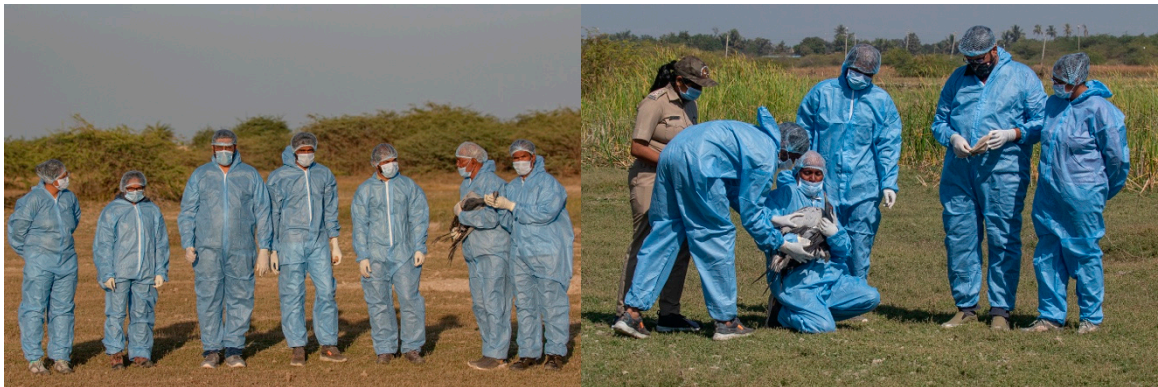

**The team preparing for the release of tagged Demoiselle Cranes.**



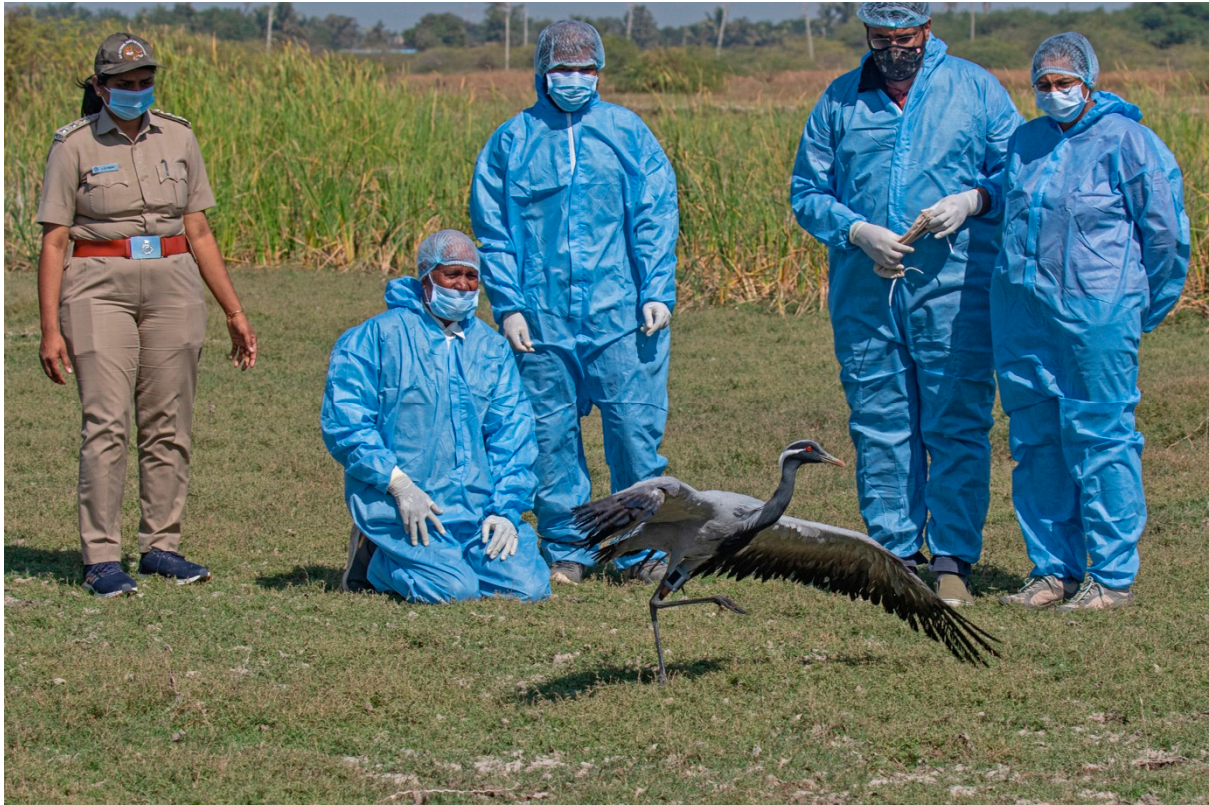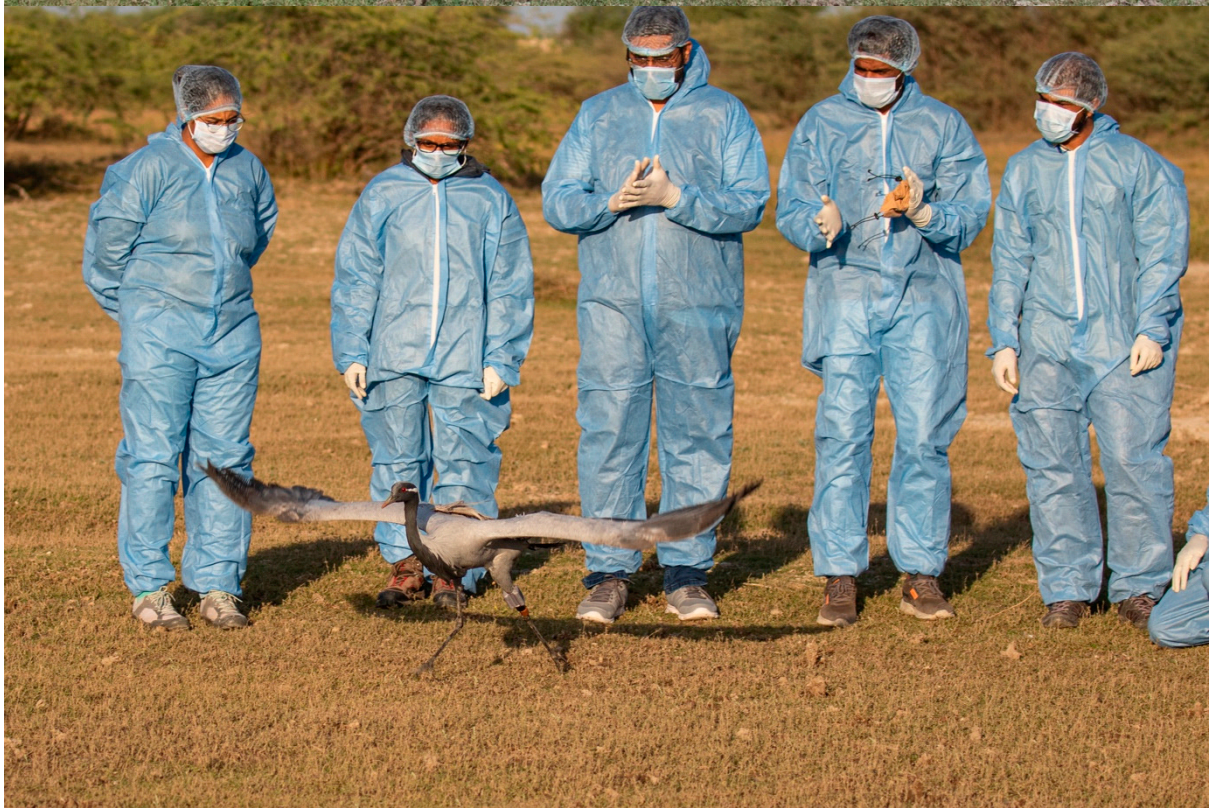

**Demoiselle Cranes is being released after tagging.**



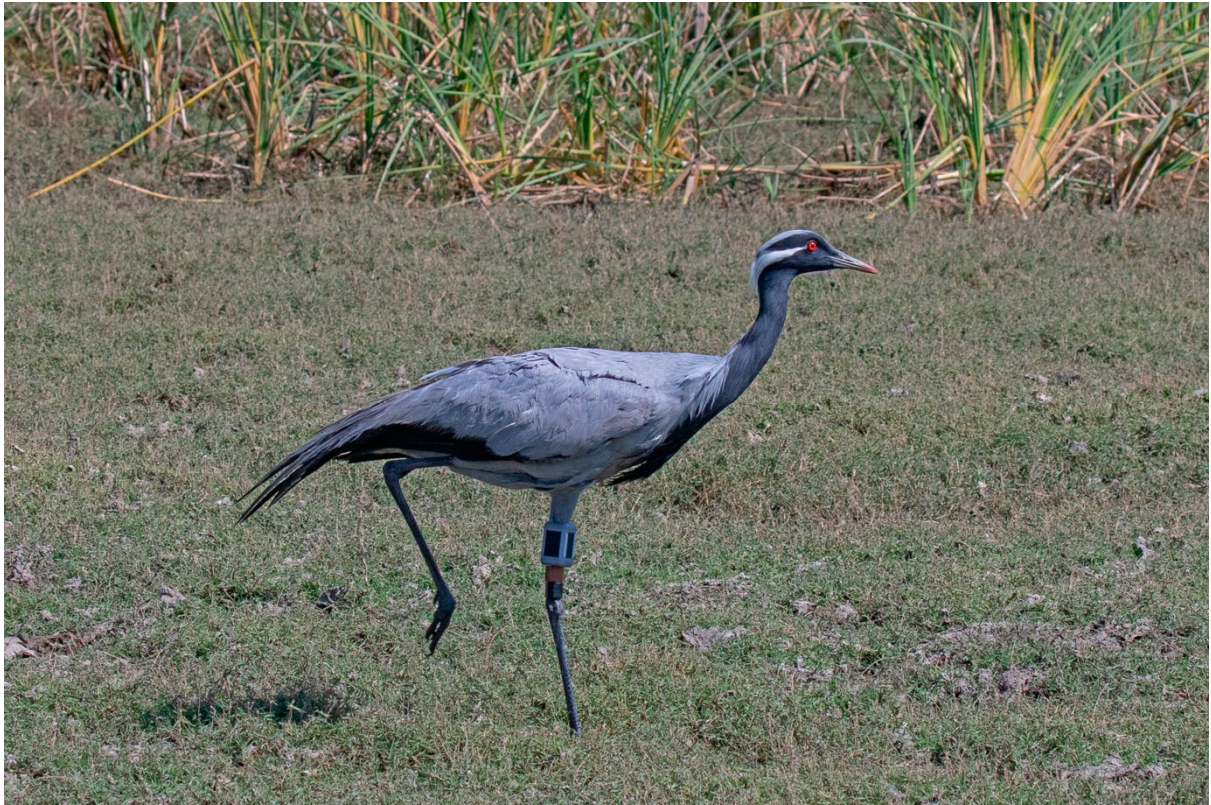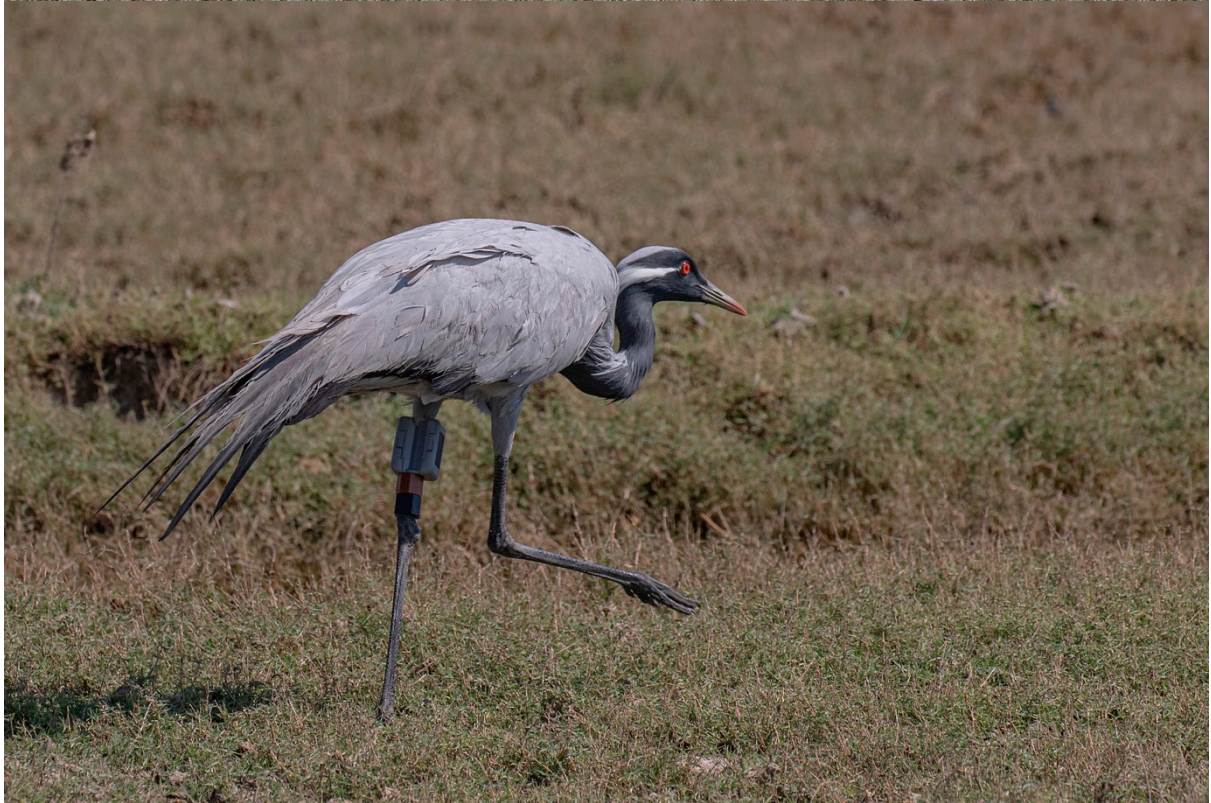

**The successful release of tagged Demoiselle Crane – 1**



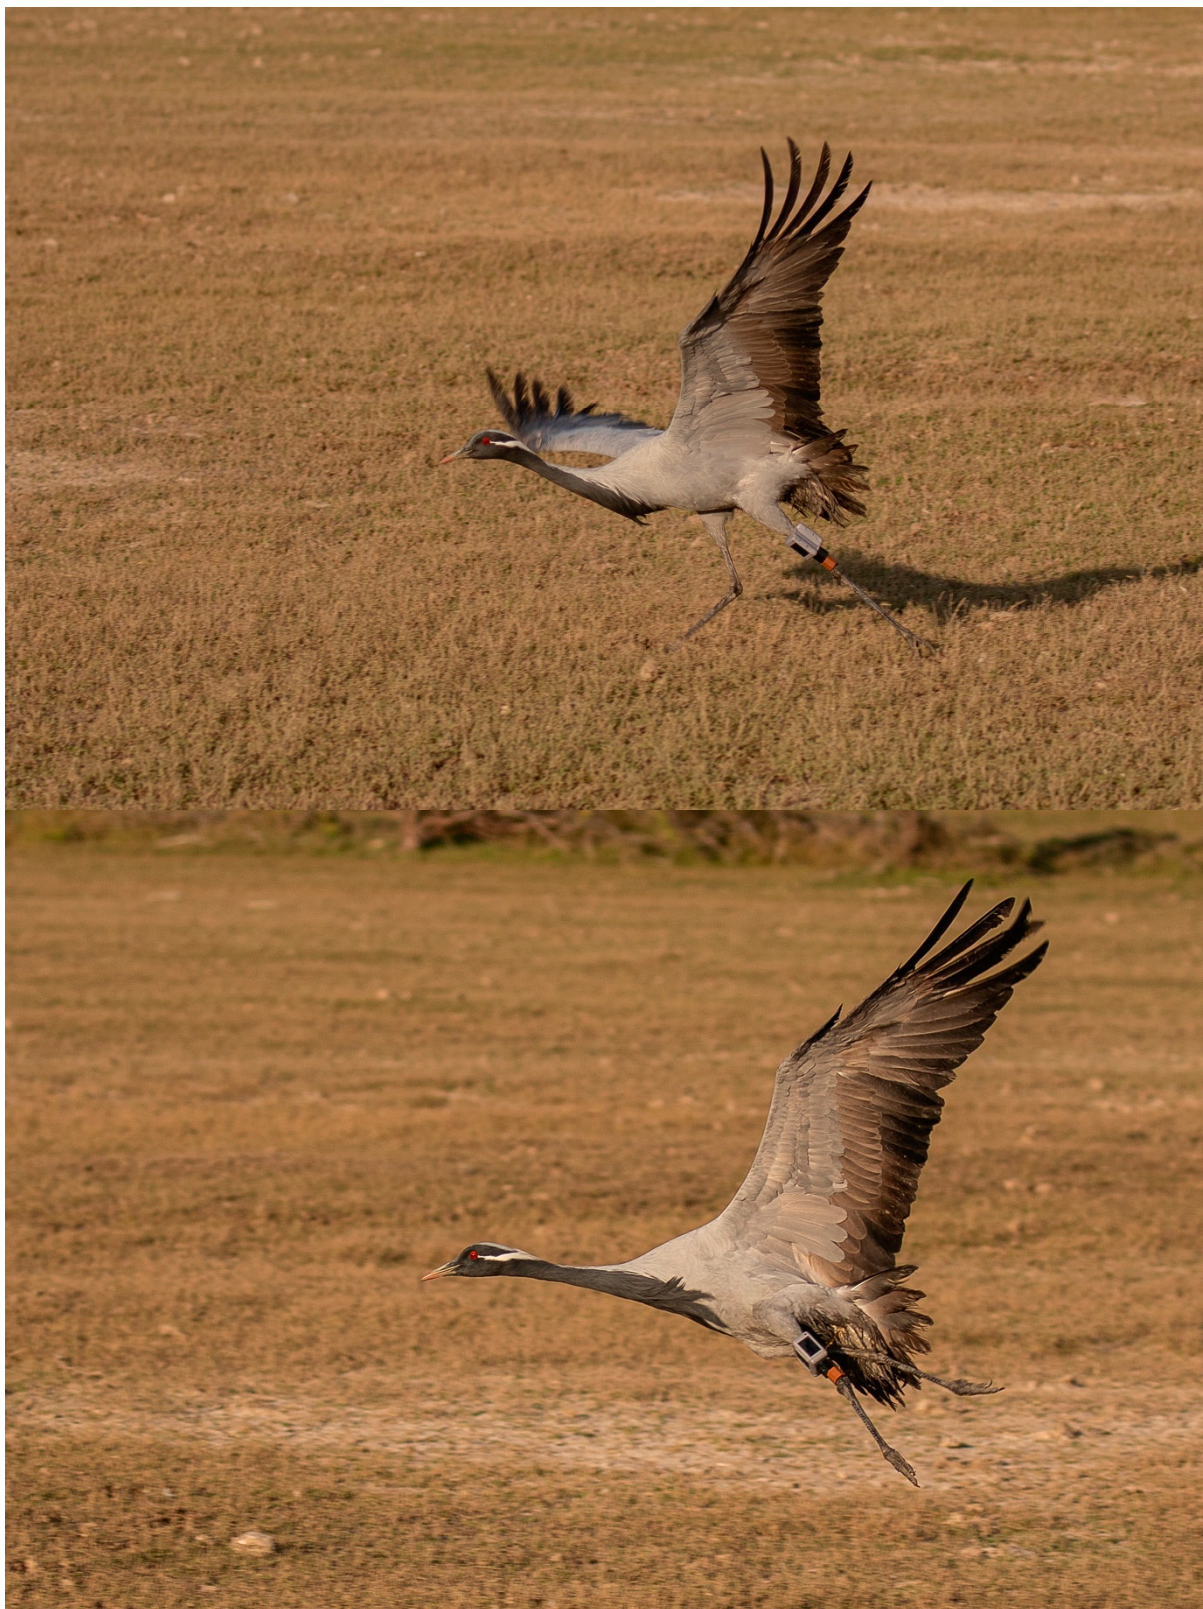

**The successful release of tagged Demoiselle Crane – 2**
