# Supplementary material
Source: MDPI journal article supplement (https://www.mdpi.com/2673-6004/4/4/29)
Supplement: s1 [file s1]

**Supplementary Information S8: Partial dependence plots showing the marginal effect of selected habitat variables on the predicated occurrences of Common Cranes and Demoiselle Cranes**

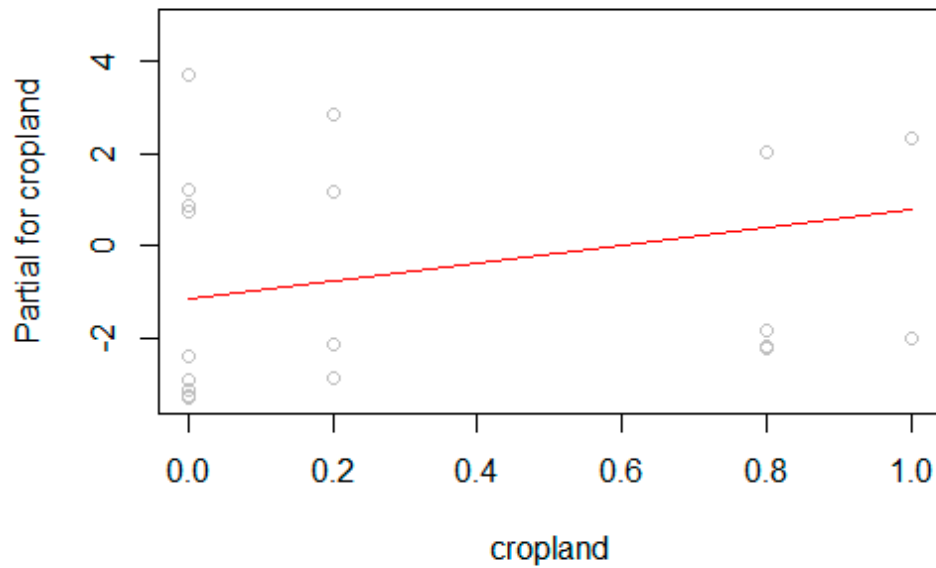

***Fig. 1 Partial dependence plot showing the marginal effect of cropland on the predicted occurrence of Common Crane-1 in Gir-Somnath landscape***

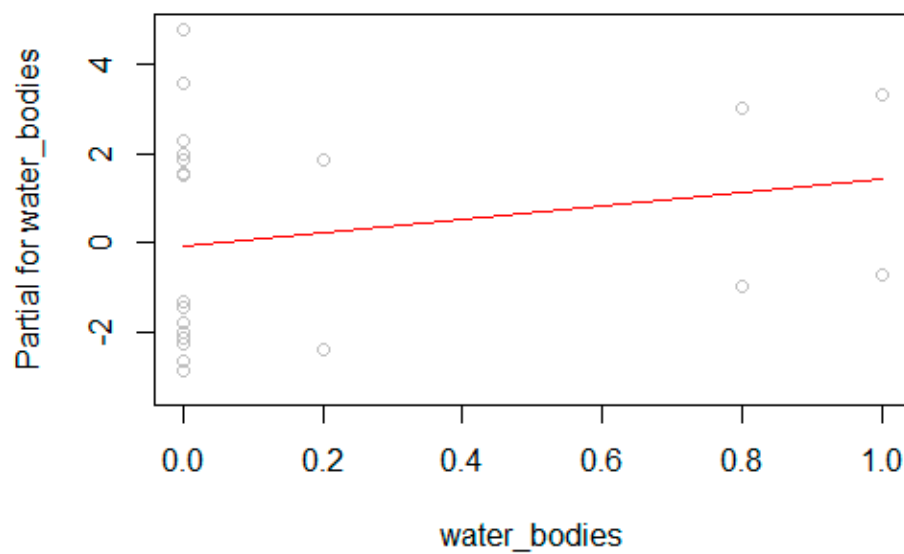

***Fig. 2 Partial dependence plot showing the marginal effect of water bodies on the predicted occurrence of Common Crane-1 in Gir-Somnath landscape***

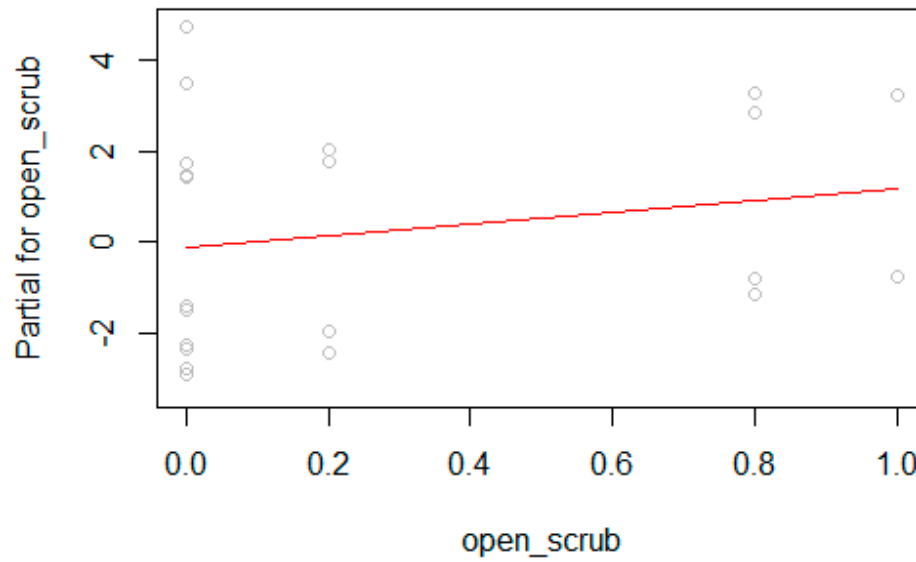

***Fig. 3 Partial dependence plot showing the marginal effect of open scrub on the predicted occurrence of Common Crane-1 in Gir-Somnath landscape***

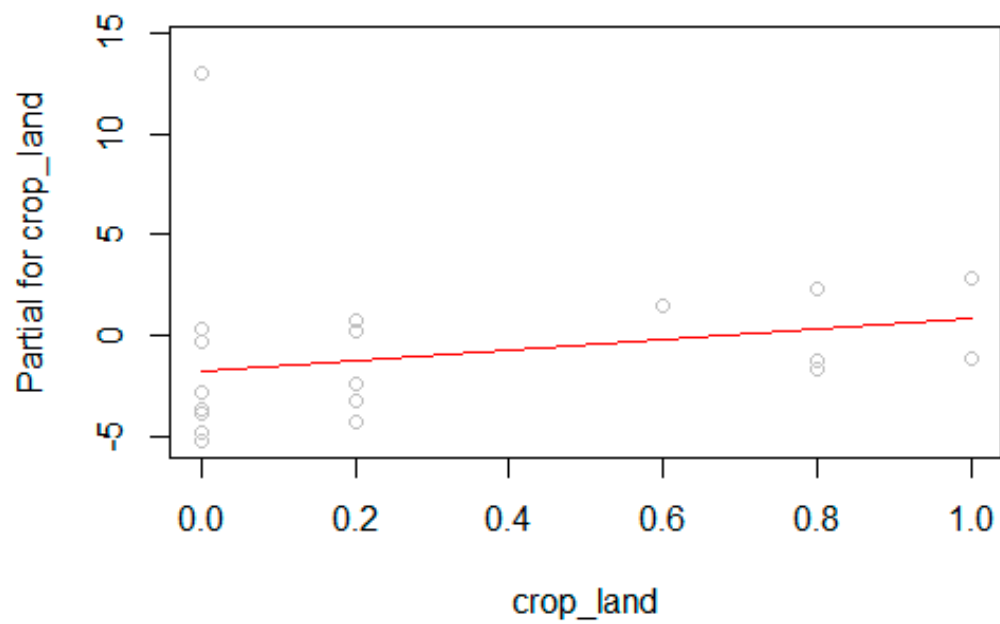

**Fig. 4** Partial dependence plot showing the marginal effect of cropland on the predicted occurrence of Common Crane-1 in Porbandar

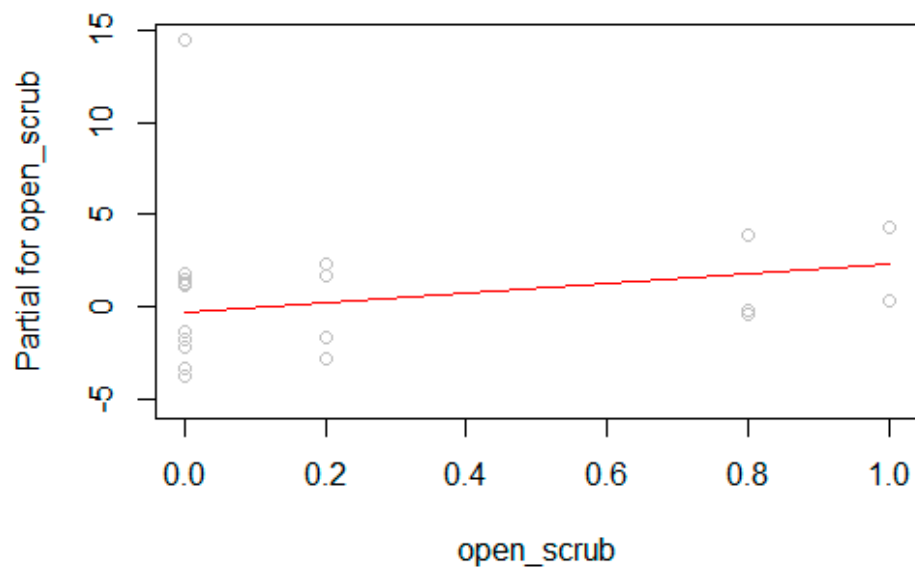

**Fig. 5** Partial dependence plot showing the marginal effect of open scrub on the predicted occurrence of Common Crane-1 in Porbandar

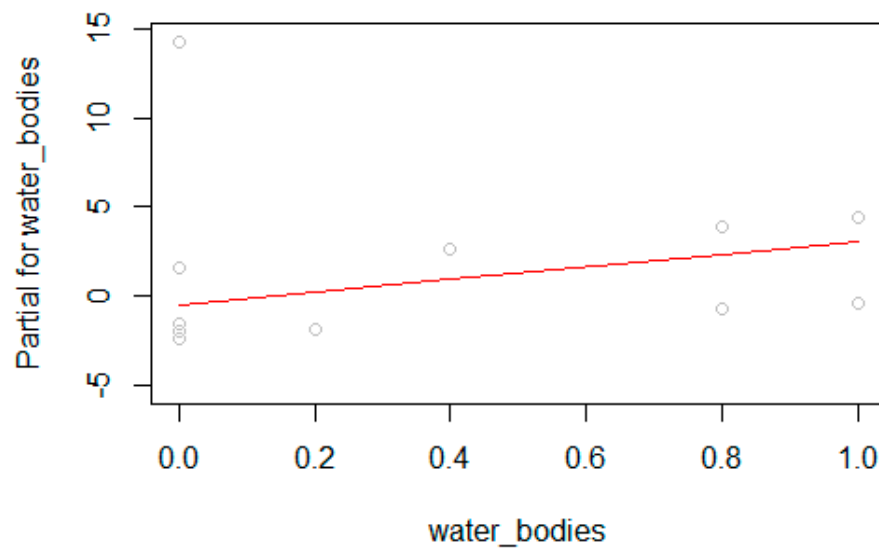

***Fig. 6 Partial dependence plot showing the marginal effect of water bodies on the predicted occurrence of Common Crane-1 in Porbandar***

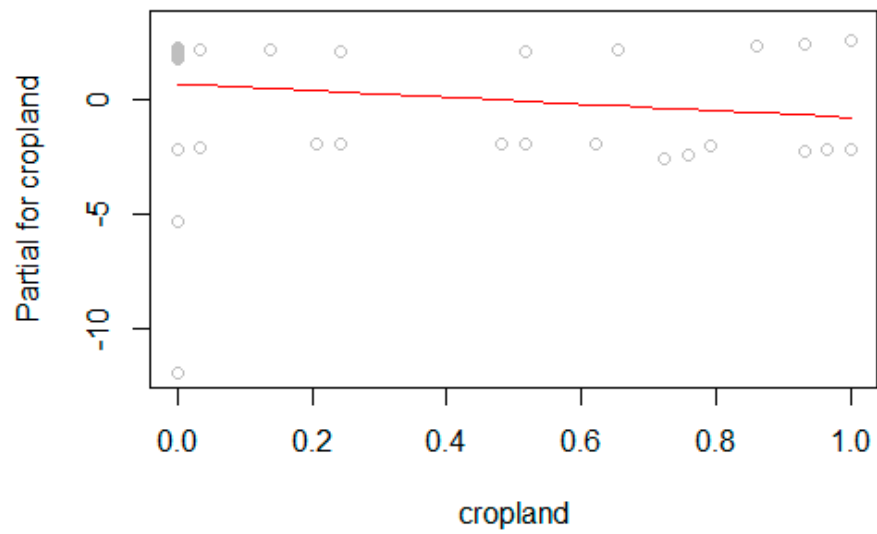

**Fig. 7** Partial dependence plot showing the marginal effect of cropland on the predicted occurrence of Common Crane-2 in Bhavnagar

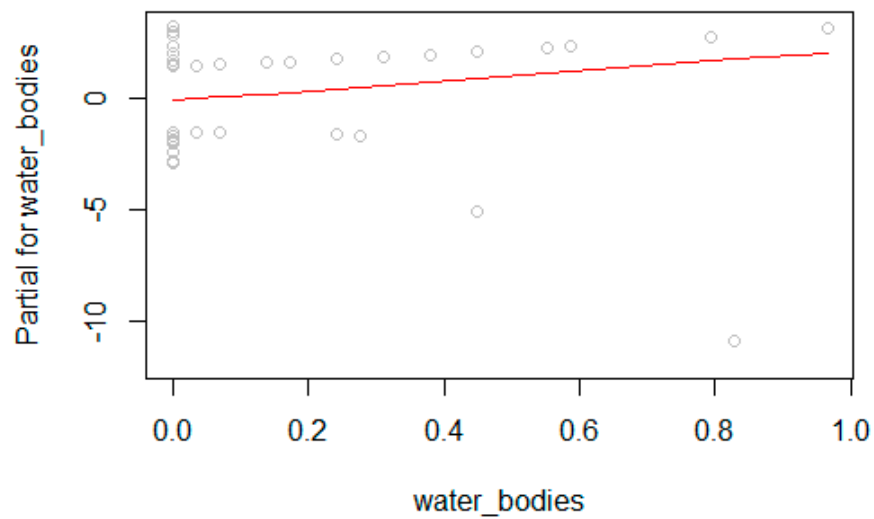

**Fig. 8** Partial dependence plot showing the marginal effect of water bodies on the predicted occurrence of Common Crane-2 in Bhavnagar

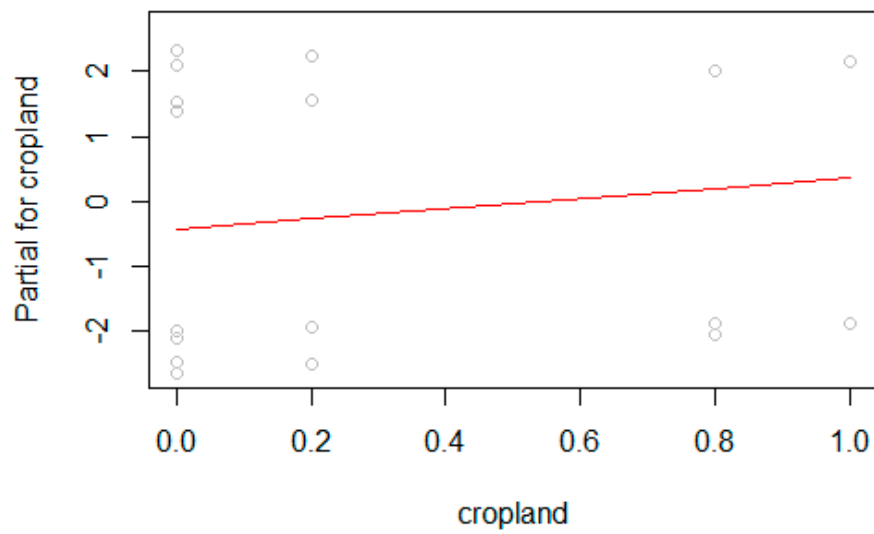

***Fig. 9 Partial dependence plot showing the marginal effect of cropland on the predicted occurrence of Common Crane-2 in Gir Somnath***

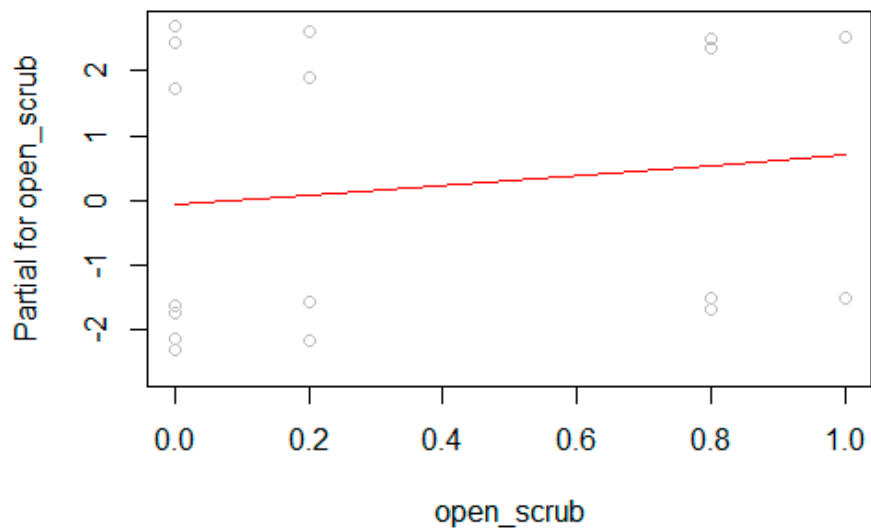

***Fig. 10 Partial dependence plot showing the marginal effect of open\_scrub on the predicted occurrence of Common Crane-2 in Gir Somnath***

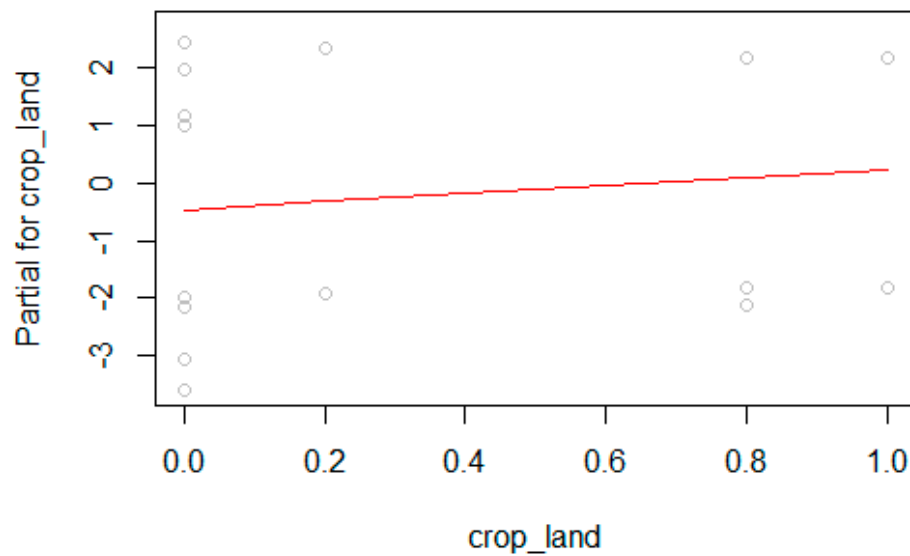

**Fig. 11** Partial dependence plot showing the marginal effect of cropland on the predicted occurrence of Demoiselle Crane-1 in Bhavnagar

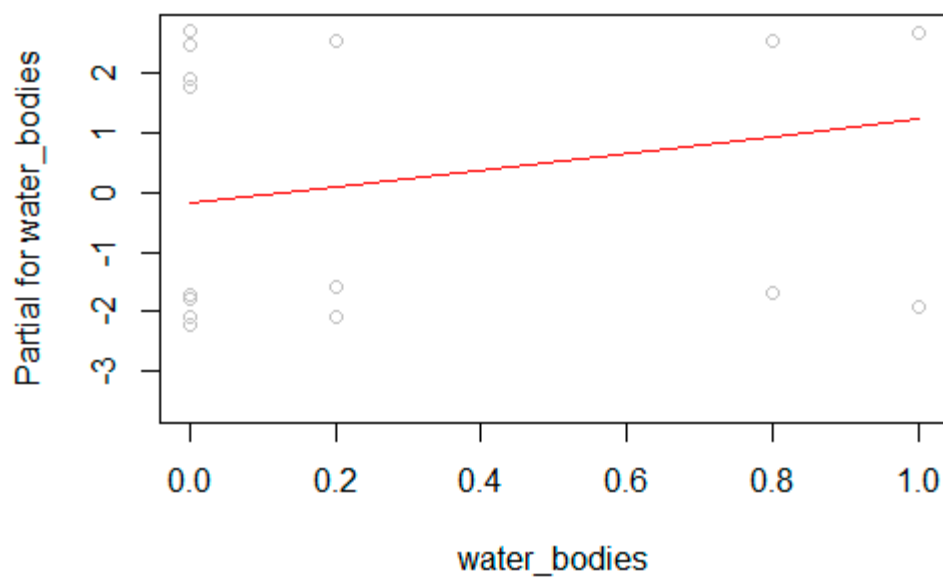

**Fig. 12** Partial dependence plot showing the marginal effect of water bodies on the predicted occurrence of Demoiselle Crane-1 in Bhavnagar

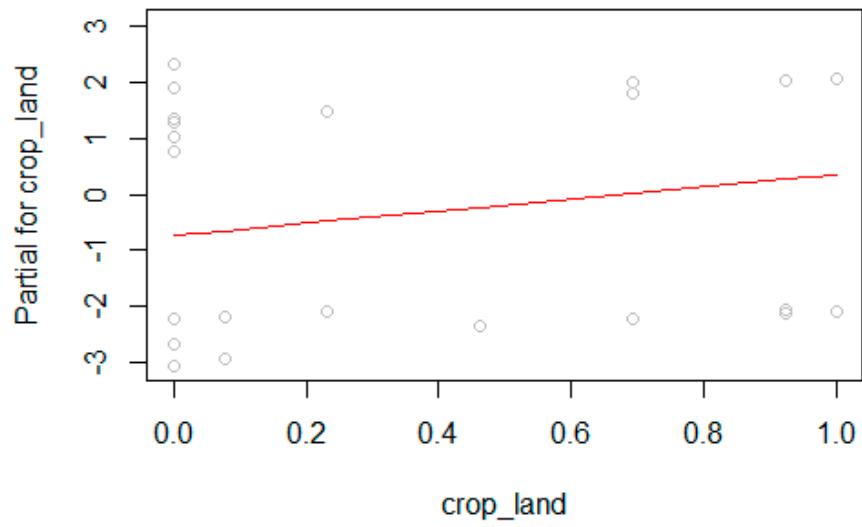

**Fig. 13** Partial dependence plot showing the marginal effect of cropland on the predicted occurrence of Demoiselle Crane-2 in Kutch

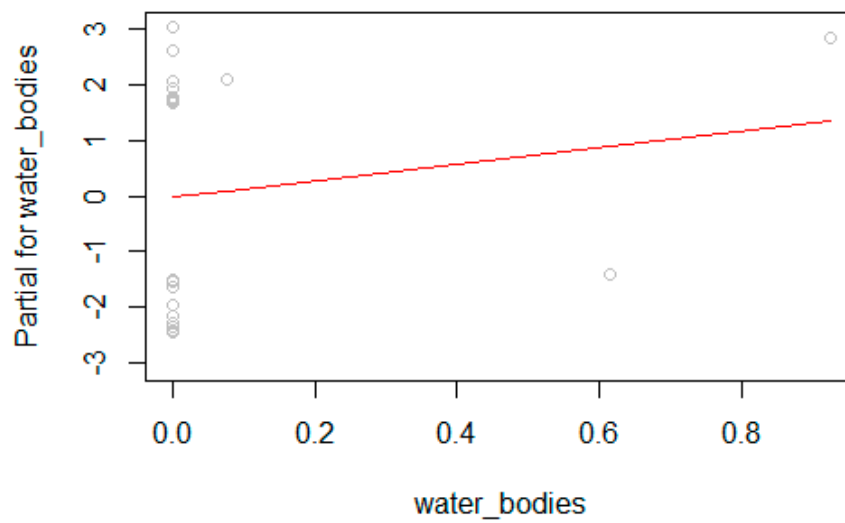

**Fig. 14** Partial dependence plot showing the marginal effect of water bodies on the predicted occurrence of Demoiselle Crane-2 in Kutch



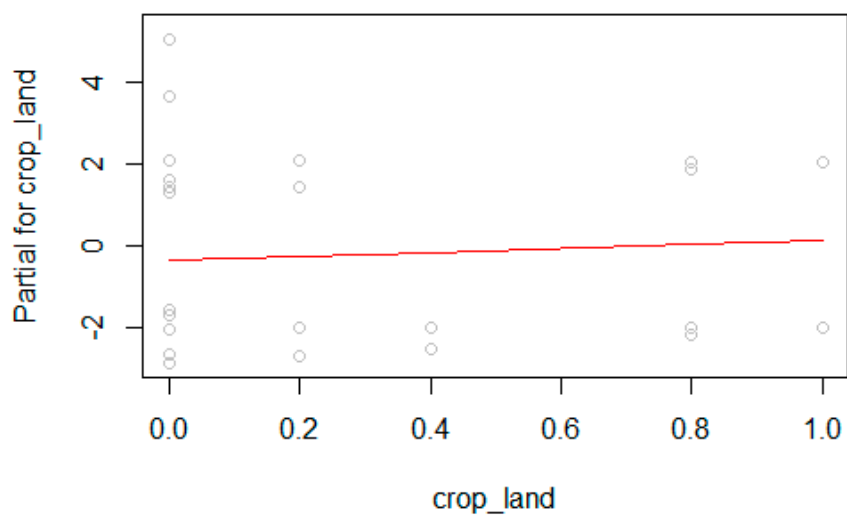

**Fig. 15** Partial dependence plot showing the marginal effect of cropland on the predicted occurrence of Demoiselle Crane-2 in Porbandar

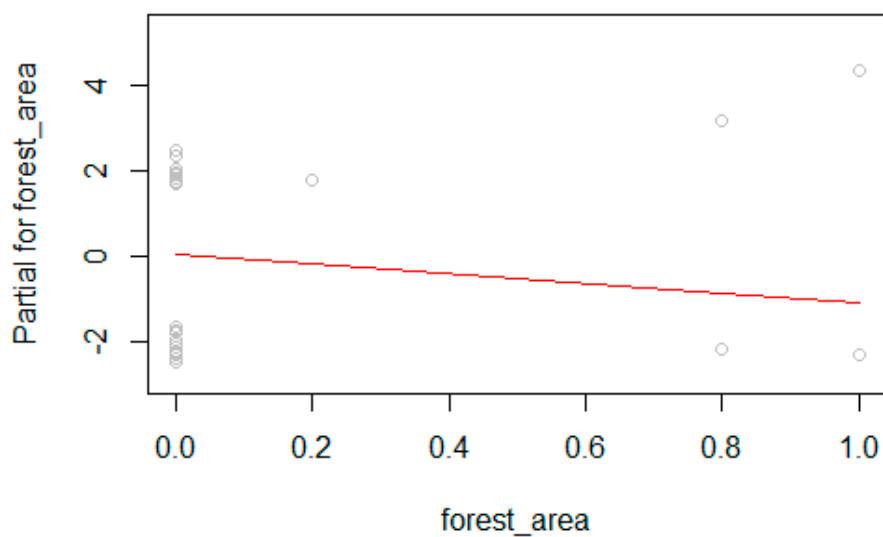

**Fig. 16** Partial dependence plot showing the marginal effect of forest area on the predicted occurrence of Demoiselle Crane-2 in Porbandar

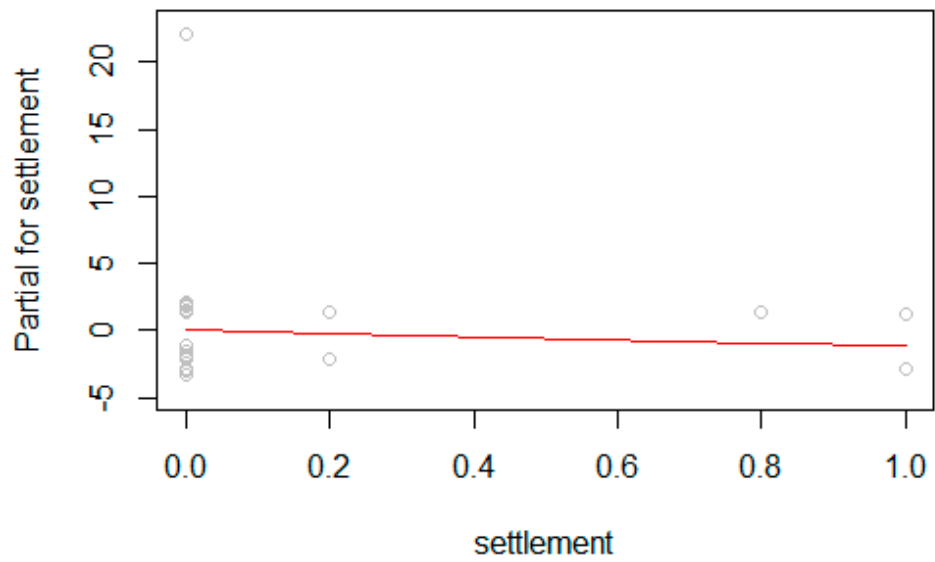

**Fig. 17** Partial dependence plot showing the marginal effect of settlement on the predicted occurrence of Demoiselle Crane-2 in Porbandar

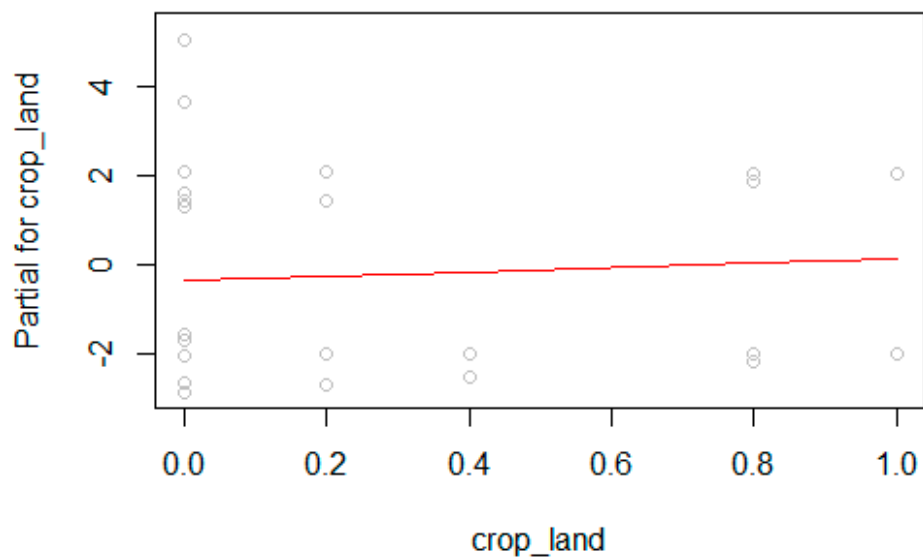

**Fig. 18** Partial dependence plot showing the marginal effect of cropland on the predicted occurrence of Demoiselle Crane-2 in Porbandar
