# Supplementary material
Source: MDPI journal article supplement (https://www.mdpi.com/2673-6004/4/4/29)
Supplement: s1 [file s1]

**Supplementary Information S7: Details of the fine-scale habitat use of Common Cranes and Demoiselle Cranes as determined by using generalized linear models.**

**Estimates of fine-scale habitat selection of Common Crane-1 in Gir-Somnath using generalized linear models (GLM). The models are ranked from best to worst according to AIC.**

| <b>Models</b>                                                                                                  | <b>deviance</b> | <b>AIC</b> | <b>ΔAIC</b> | <b>P-value</b> |
|----------------------------------------------------------------------------------------------------------------|-----------------|------------|-------------|----------------|
| cropland + open_scrub + water_bodies                                                                           | 365.04          | 373.04     | 0           | 0.0001***      |
| cropland + open_scrub + settlement+<br>water_bodies                                                            | 363.14          | 373.14     | 0.1         | 0.0001***      |
| built_up+cropland + open_scrub +<br>settlement+ water_bodies                                                   | 362.91          | 374.91     | 1.87        | 0.0001***      |
| built_up+cropland +dense_scrub+ dry_dec_sc<br>+ dry_mix_dec+ dry_teak+open_scrub +<br>settlement+ water_bodies | 344.82          | 378.82     | 5.78        | 0.004**        |
| built_up+cropland + dry_dec_sc +<br>dry_mix_dec+ dry_teak+open_scrub +<br>settlement+ water_bodies             | 347.92          | 385.92     | 12.88       | 0.01*          |

The models were fitted using a backward selection process by removing one variable at a time and so on. The variables included built up areas (built\_up), croplands (crop\_land), dry deciduous scrub (dry\_dec\_sc), dry mixed deciduous forest (dry\_mix\_dec), dry teak forest (dry\_teak), open scrub habitats (open\_scrub), areas dominated with human settlements (settlement), and water bodies (water\_bodies). The models were fitted using a binomial error structure. \*\*\* denotes  $P < 0.0001$ , \*\* $P < 0.005$ , and \*denotes  $P < 0.05$

Estimates of fine-scale habitat selection of Common Crane-1 in Porbandar from January to February using generalized linear models (GLM). The models are ranked from best to worst according to AIC.

| Models                                                                            | deviance | AIC    | $\Delta$ AIC | P-value   |
|-----------------------------------------------------------------------------------|----------|--------|--------------|-----------|
| crop_land + open_scrub + water_bodies                                             | 499.20   | 507.20 | 0            | 0.0001*** |
| crop_land + open_scrub + settlement<br>+water_bodies                              | 497.79   | 507.79 | 0.59         | 0.002**   |
| crop_land + forest_area + open_scrub +<br>settlement + water_bodies               | 495.48   | 507.98 | 0.78         | 0.07      |
| built_up + crop_land + forest_area +<br>open_scrub +<br>settlement + water_bodies | 489.34   | 513.34 | 6.14         | 0.99      |

The models were fitted using a backward selection process by removing one variable at a time and so on. The variables included built-up area (built\_up), croplands (crop\_land), forested areas (forest\_area), open scrub habitats (open\_scrub), areas dominated with human settlements (settlement), and water bodies (water\_bodies). The models were fitted using a binomial error structure. \*\*\* denotes  $P < 0.001$ , \*\* $P < 0.005$ , and denotes  $P < 0.10$

**Estimates of fine-scale habitat selection of Common Crane-2 in Bhavnagar using generalized linear models (GLM). The models are ranked from best to worst according to AIC.**

| <b>Models</b>                                                | <b>deviance</b> | <b>AIC</b> | <b><math>\Delta</math>AIC</b> | <b>P-value</b> |
|--------------------------------------------------------------|-----------------|------------|-------------------------------|----------------|
| cropland + water_bodies                                      | 321.28          | 327.28     | 0                             | 0.002**        |
| cropland + saltpans + water_bodies                           | 320.66          | 328.66     | 0.38                          | 0.004**        |
| cropland +open_scrub + saltpans +<br>water_bodies            | 320.40          | 330.4      | 3.12                          | 0.48           |
| cropland +grassland +open_scrub + saltpans +<br>water_bodies | 312.55          | 334.55     | 7.27                          | 0.98           |

The models were fitted using a backward selection process by removing one variable at a time and so on. The variables included croplands (crop\_land), grasslands (grassland), open scrub habitats (open\_scrub), saltpans (saltpans), and water bodies (water\_bodies). The models were fitted using a binomial error structure. \*\*P<0.005

**Estimates of fine-scale habitat selection of Common Crane-2 in Gir-Somnath using generalized linear models (GLM). The models are ranked from best to worst according to AIC.**

| <b>Models</b>                                                                                                     | <b>deviance</b> | <b>AIC</b> | <b>ΔAIC</b> | <b>P-value</b> |
|-------------------------------------------------------------------------------------------------------------------|-----------------|------------|-------------|----------------|
| cropland + open_scrub                                                                                             | 744.37          | 750.37     | 0           | 0.0001***      |
| cropland + water_bodies + open_scrub                                                                              | 744.37          | 752.37     | 2           | 0.0001***      |
| cropland + water_bodies + settlement + open_scrub + dry_teak + dry_mix_dec + dry_dec_sec + dense_scrub + built_up | 687.09          | 805.09     | 54.72       | 0.95           |
| cropland + water_bodies + open_scrub + dry_teak + dry_mix_dec + dry_dec_sec + dense_scrub                         | 689.74          | 805.74     | 55.73       | 0.79           |
| cropland + water_bodies+open_scrub +dry_mix_dec + dry_dec_sec+ dense_scrub                                        | 696.29          | 810.29     | 59.92       | 0.50           |

The models were fitted using a backward selection process by removing one variable at a time and so on. The variables included built up (built\_up), croplands (crop\_land), dry deciduous scrub (dry\_dec\_sc), dry mixed deciduous forest (dry\_mix\_dec), dense scrub (dense\_scrub), dry teak forests (dry\_teak), open scrub habitats (open\_scrub), areas dominated with human settlements (settlement), and water bodies (water\_bodies). The models were fitted using a binomial error structure. \*\*\* denotes  $P < 0.0001$

**Estimates of fine-scale habitat selection of Demoiselle Crane-1 in Porbandar from using generalized linear models (GLM). The models are ranked from best to worst according to AIC.**

| <b>Models</b>                                                                                | <b>deviance</b> | <b>AIC</b> | <b><math>\Delta</math>AIC</b> | <b>P-value</b> |
|----------------------------------------------------------------------------------------------|-----------------|------------|-------------------------------|----------------|
| crop_land + water_bodies                                                                     | 401.25          | 407.24     | 0                             | 0.02*          |
| crop_land + open_scrub + water_bodies                                                        | 400.00          | 408.00     | 0.76                          | 0.01*          |
| built_up + crop_land + forest_area +<br>open_scrub +<br>water_bodies                         | 396.83          | 408.83     | 1.59                          | 0.41           |
| crop_land + forest_area + open_scrub +<br>water_bodies                                       | 399.83          | 409.83     | 2.59                          | 0.33           |
| built_up + crop_land + forest_area +<br>open_scrub +<br>saltpans + water_bodies              | 391.41          | 410.41     | 3.17                          | 0.11           |
| built_up + crop_land + forest_area +<br>open_scrub +<br>saltpans + settlement + water_bodies | 389.15          | 411.15     | 3.91                          | 0.98           |

The models were fitted using a backward selection process by removing one variable at a time and so on. The variables included built up area (built\_up), croplands (crop\_land), forested areas (forest\_area), open scrub habitats (open\_scrub), saltpans (saltpans), areas dominated with human settlements (settlement), and water bodies (water\_bodies). The models were fitted using a binomial error structure. \* denotes  $P < 0.05$

Estimates of fine scale-habitat selection of Demoiselle Crane-2 in Kutch using generalized linear models (GLM). The models are ranked from best to worst according to AIC.

| Models                                                              | deviance | AIC    | $\Delta$ AIC | P-value |
|---------------------------------------------------------------------|----------|--------|--------------|---------|
| crop_land + water_bodies                                            | 156.36   | 162.36 | 0            | 0.16    |
| crop_land + water_bodies + open_scrub                               | 155.86   | 163.86 | 1.5          | 0.12    |
| crop_land + water_bodies + prosopis_scrub + open_scrub              | 155.39   | 165.39 | 3.03         | 0.09    |
| crop_land + water_bodies + settlement + prosopis_scrub + open_scrub | 154.58   | 166.58 | 4.22         | 0.13    |

The models were fitted using a backward selection process by removing one variable at a time and so on. The variables included croplands (crop\_land), open scrub habitats (open\_scrub), scrub habitats dominated with *Prosopis* (prosopis\_scrub), areas dominated with human settlements (settlement), and water bodies (water\_bodies). The models were fitted using a binomial error structure. denotes  $P < 0.10$

**Estimates of fine-scale habitat selection of Demoiselle Crane-2 in Porbandar using generalized linear models (GLM). The models are ranked from best to worst according to AIC.**

| <b>Models</b>                                                                                        | <b>deviance</b> | <b>AIC</b> | <b><math>\Delta</math>AIC</b> | <b>P-value</b> |
|------------------------------------------------------------------------------------------------------|-----------------|------------|-------------------------------|----------------|
| crop_land + forest_area + open_scrub + settlement                                                    | 1143            | 1153.62    | 0                             | 0.0001***      |
| crop_land + forest_area + open_scrub + saltpans + settlement                                         | 1142            | 1155.97    | 2.35                          | 0.0001***      |
| crop_land + dense_scrub + forest_area + open_scrub + saltpans + settlement                           | 1142            | 1156.99    | 3.37                          | 0.0001***      |
| built_up + crop_land + dense_scrub + forest_area + open_scrub + saltpans + settlement                | 1141            | 1158.99    | 5.37                          | 0.0001***      |
| built_up + crop_land + dense_scrub + forest_area + open_scrub + saltpans + settlement + water_bodies | 1141            | 1161.50    | 7.88                          | 0.27           |

The models were fitted using a backward selection process by removing one variable at a time and so on. The variables included built up area (built\_up), croplands (crop\_land), forested areas (forest\_area), open scrub habitats (open\_scrub), dense scrub (dense\_scrub), saltpans (saltpans), areas dominated with human settlements (settlement), and water bodies (water\_bodies). The models were fitted using a binomial error structure. \*\*\* denotes  $P < 0.0001$
