# Supplementary material
Source: MDPI journal article supplement (https://www.mdpi.com/2673-6004/4/4/29)
Supplement: s1 [file s1]

**Supplementary Information S2: Model validation matrix of the fine-scale habitat selection model (GLM) of Common Cranes and Demoiselle Cranes during their winter stay in Gujarat, India**

| ID                 | Site        | Performance matrix       | value  |
|--------------------|-------------|--------------------------|--------|
| Common Crane-1     | Gir-Somnath | Specificity              | 0.52   |
|                    |             | Sensitivity              | 0.80   |
|                    |             | Mis-classification error | 0.33   |
|                    |             | Accuracy                 | 0.66   |
|                    |             | P-value                  | 0.0001 |
| Common Crane-1     | Porbandar   | Specificity              | 0.91   |
|                    |             | Sensitivity              | 0.20   |
|                    |             | Mis-classification error | 0.43   |
|                    |             | Accuracy                 | 0.56   |
|                    |             | P-value                  | 0.0001 |
| Common Crane-2     | Bhavnagar   | Specificity              | 0.65   |
|                    |             | Sensitivity              | 0.70   |
|                    |             | Mis-classification error | 0.32   |
|                    |             | Accuracy                 | 0.67   |
|                    |             | P-value                  | 0.001  |
| Common Crane-2     | Gir-Somnath | Specificity              | 0.45   |
|                    |             | Sensitivity              | 0.71   |
|                    |             | Mis-classification error | 0.41   |
|                    |             | Accuracy                 | 0.58   |
|                    |             | P-value                  | 0.0001 |
| Demoiselle Crane-1 | Porbandar   | Specificity              | 0.28   |
|                    |             | Sensitivity              | 0.81   |
|                    |             | Mis-classification error | 0.44   |
|                    |             | Accuracy                 | 0.54   |
|                    |             | P-value                  | 0.01   |
| Demoiselle Crane-2 | Kutch       | Specificity              | 0.36   |
|                    |             | Sensitivity              | 0.80   |
|                    |             | Mis-classification error | 0.40   |
|                    |             | Accuracy                 | 0.59   |
|                    |             | P-value                  | 0.001  |
| Demoiselle Crane-2 | Porbandar   | Specificity              | 0.81   |
|                    |             | Sensitivity              | 0.31   |
|                    |             | Mis-classification error | 0.42   |
|                    |             | Accuracy                 | 0.57   |
|                    |             | P-value                  | 0.0001 |
