# Supplementary material
Source: MDPI journal article supplement (https://www.mdpi.com/2673-6004/4/4/29)
Supplement: s1 [file s1]

**Supplementary Information S3: Home range polygons of Common Cranes and Demoiselle Cranes described in breeding (Russia and Kazakhstan) and non-breeding ranges (Gujarat, India)**

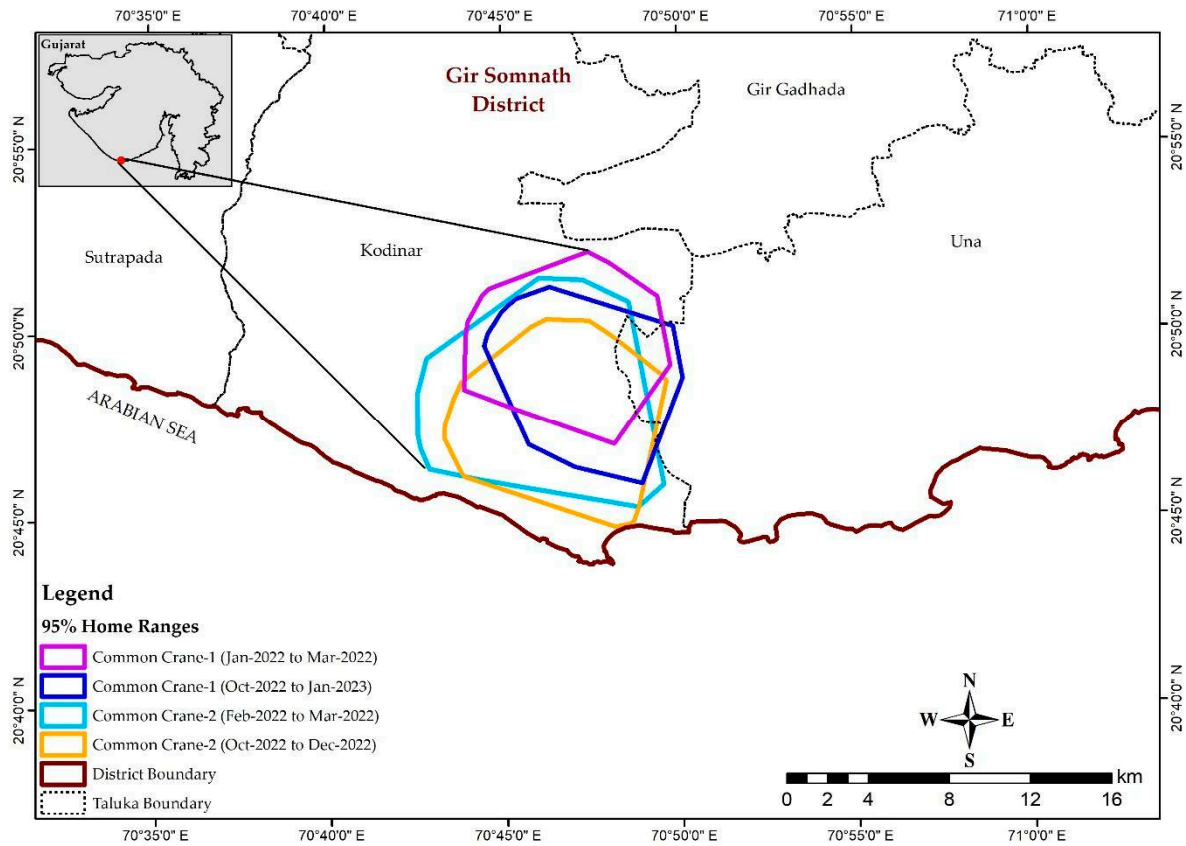

**Fig 1 Home range polygons of Common Crane-1 and Common Crane-2 calculated in Gir-Somnath district, Gujarat, India. Two Polygons each were calculated for Common Crane-1 and Common Crane-2. For Common Crane-1, the first polygon was calculated between January 2022 to March 2022, and the second polygon for Common Crane-1 was calculated between October 2022 to January 2023. For Common Crane-2, the first polygon was calculated between February 2022 to March 2022, and the second between October 2022 to December 2022**

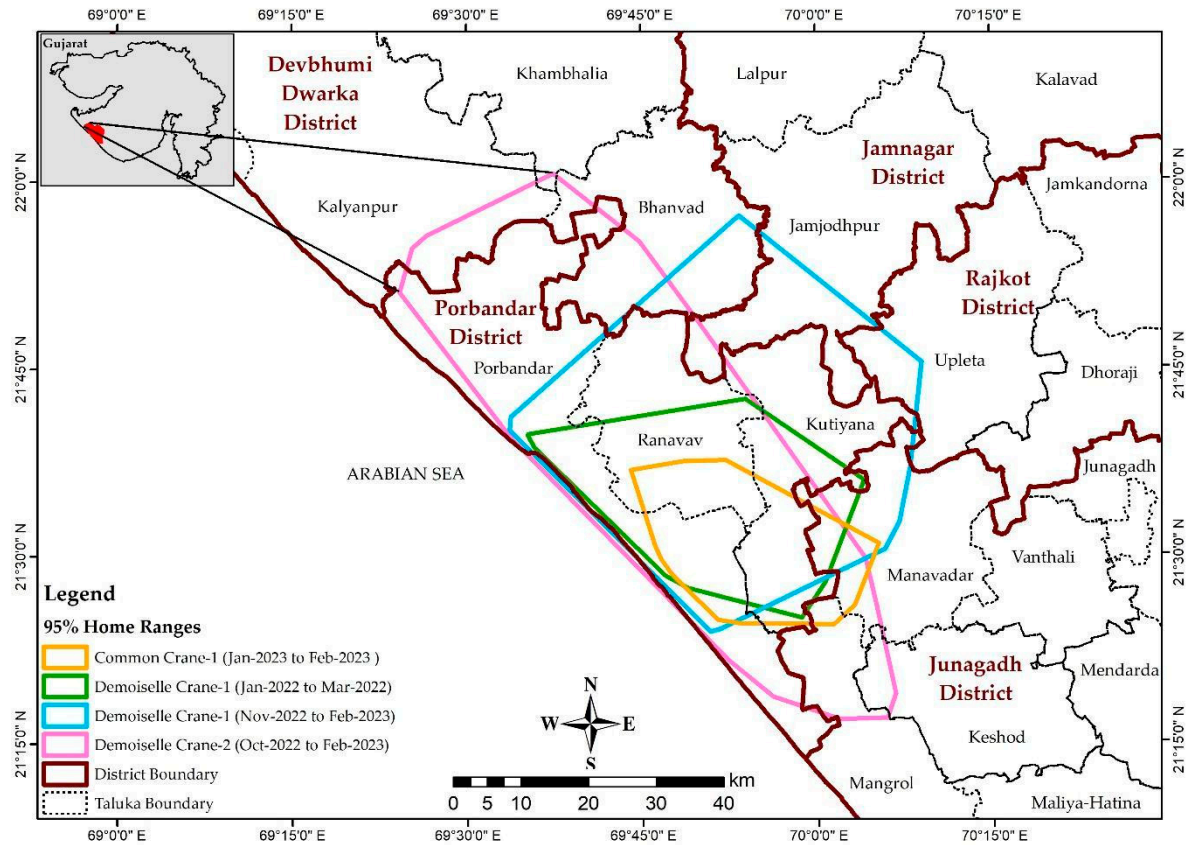

**Fig 2 Home range polygons of Common Cranes and Demoiselle Cranes calculated in Porbandar, Gujarat, India. For Common Crane-1, the home range was calculated between January 2023 to February 2023. For Demoiselle Crane-1, two home range polygons were calculated between January 2022 to March 2022, and November 2022 to February 2023 within the Porbandar district. For Demoiselle Crane-2, the home range polygon was calculated between October 2022 to February 2023**

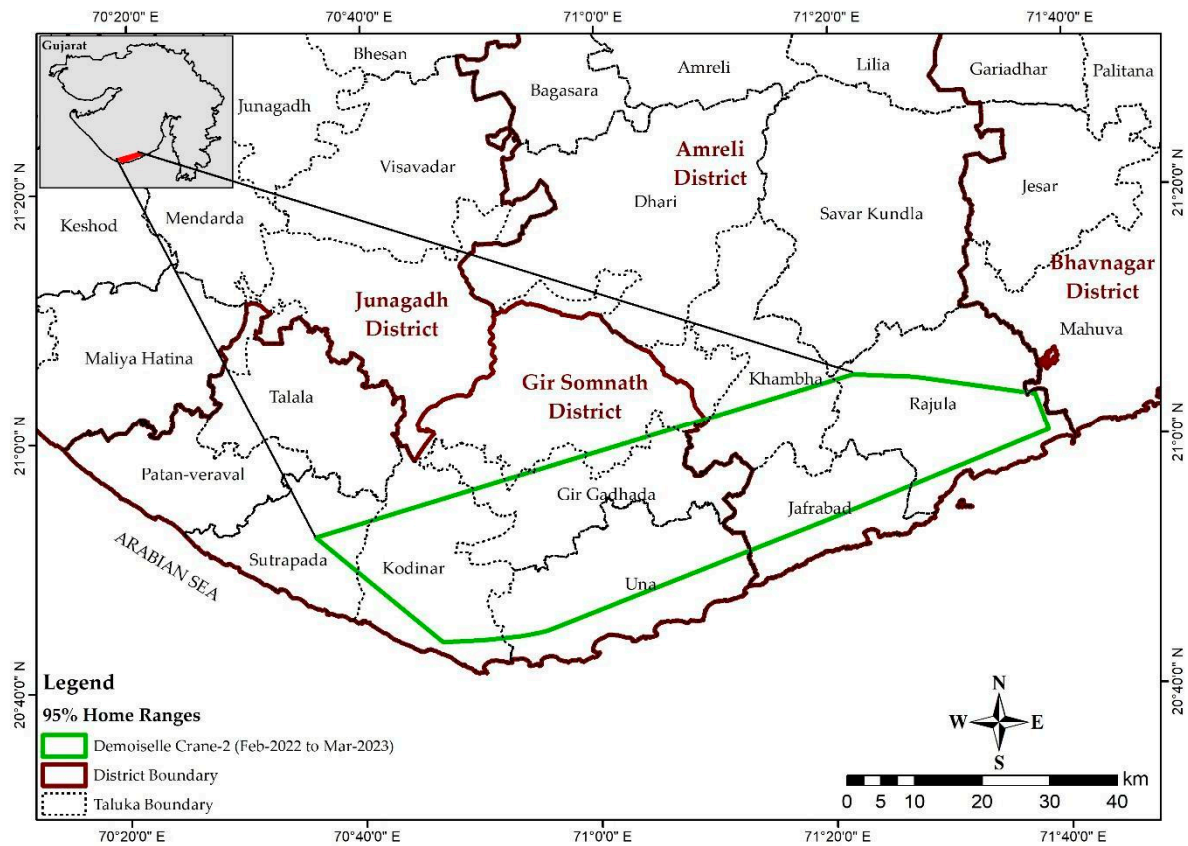

**Fig 3 Home range polygon of Demoiselle Crane-2 calculated between February 2022 to March 2023 in Gir-Somnath district**

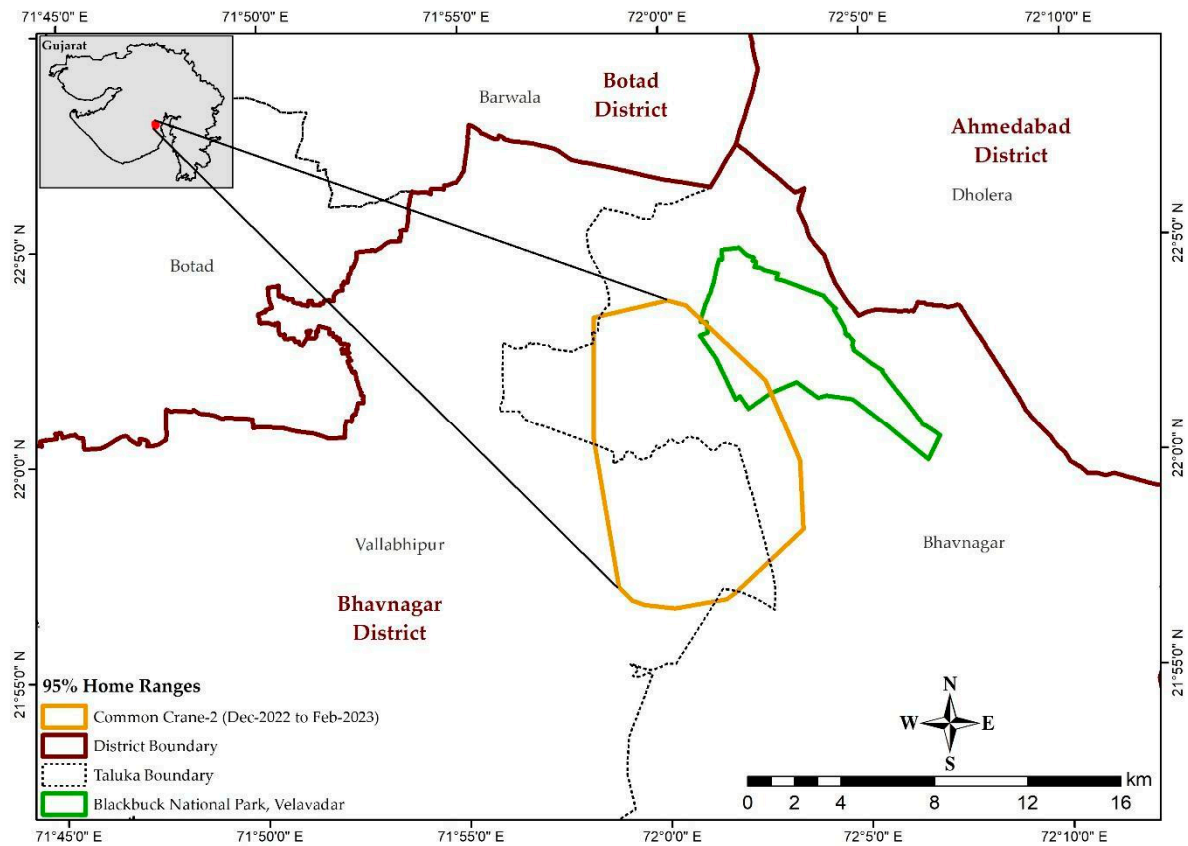

**Fig 4 Home range polygon of Common Crane-2 calculated between December 2022 to February 2023 in Bhavnagar district, Gujarat, India. A smaller part of the home range was located within Blackbuck National Park.**

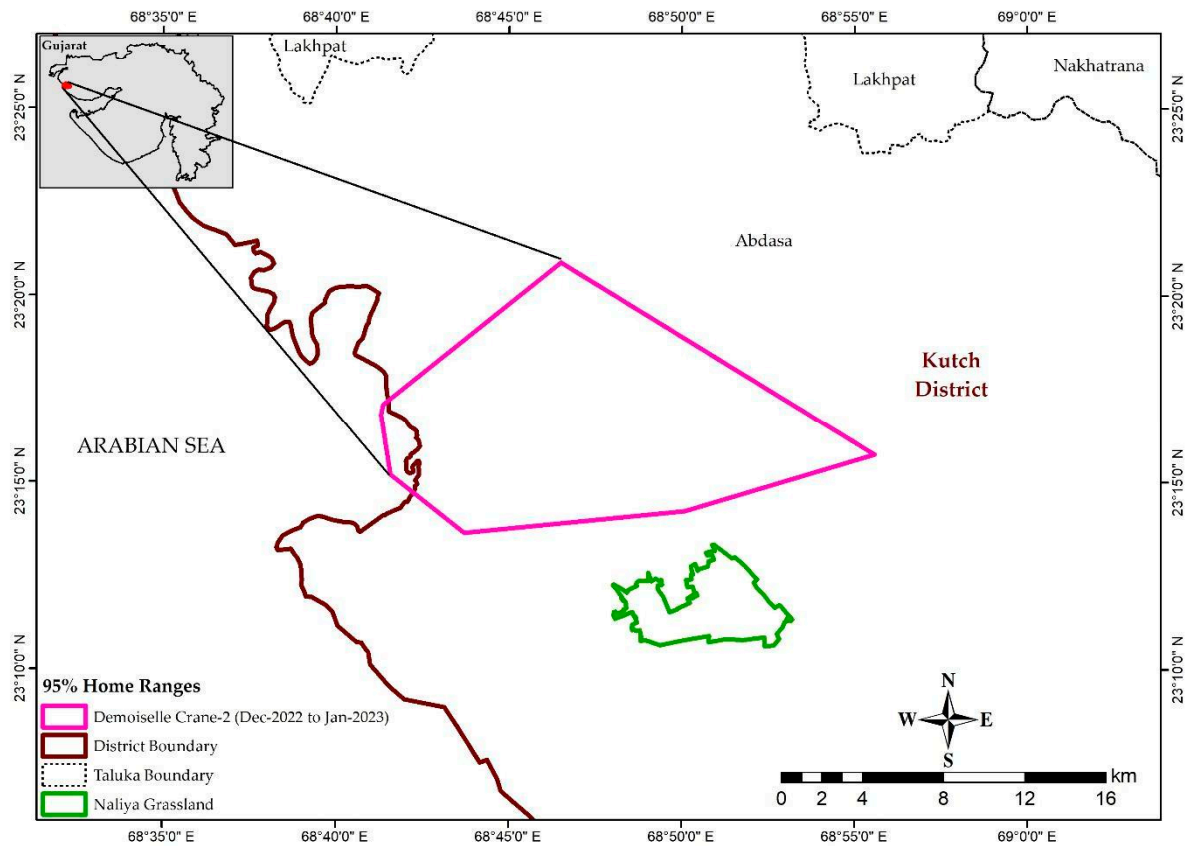

**Fig 5 Home range polygon of Demoiselle Crane-2 calculated between December 2022 to January 2023 in Kutch, Gujarat, India.**

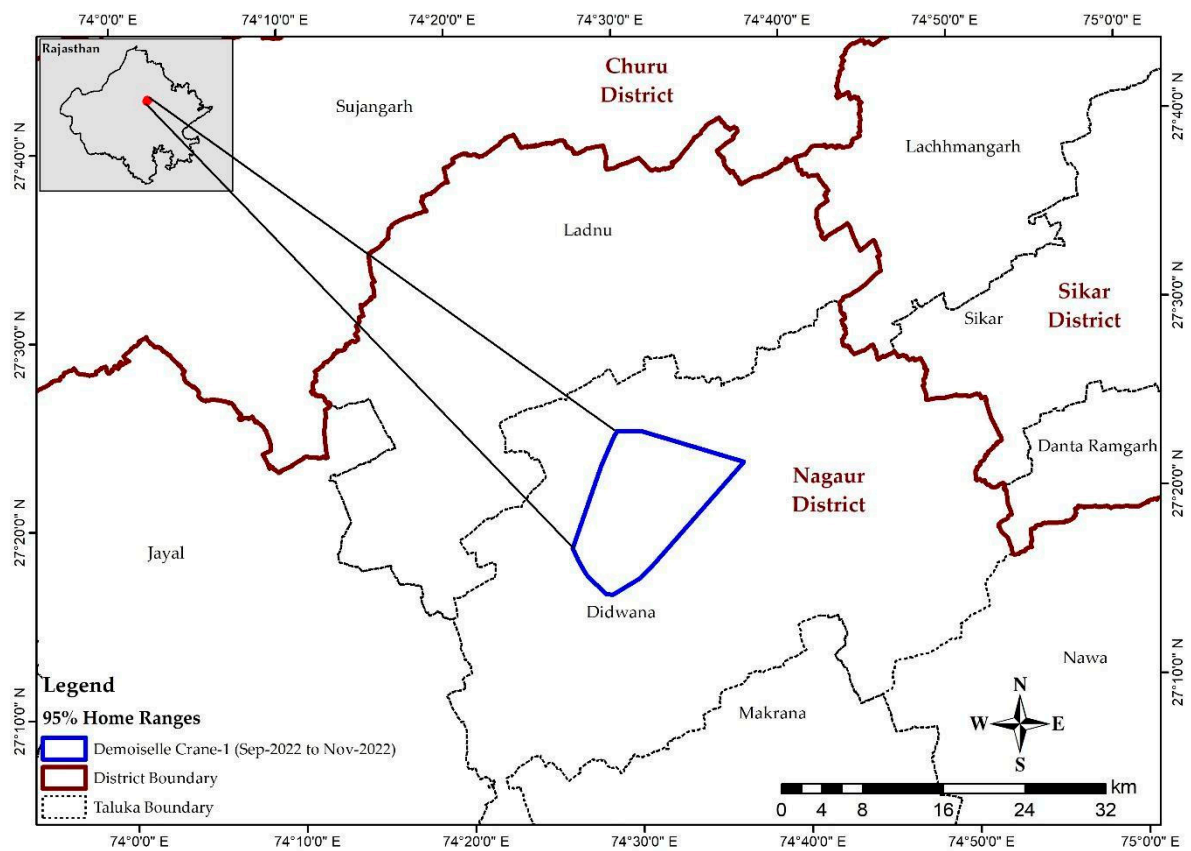

**Fig 6 Home range polygon of Demoiselle Crane-1 calculated between September 2022 to November 2022 in the Nagaur district of the northwestern state of Rajasthan, India.**

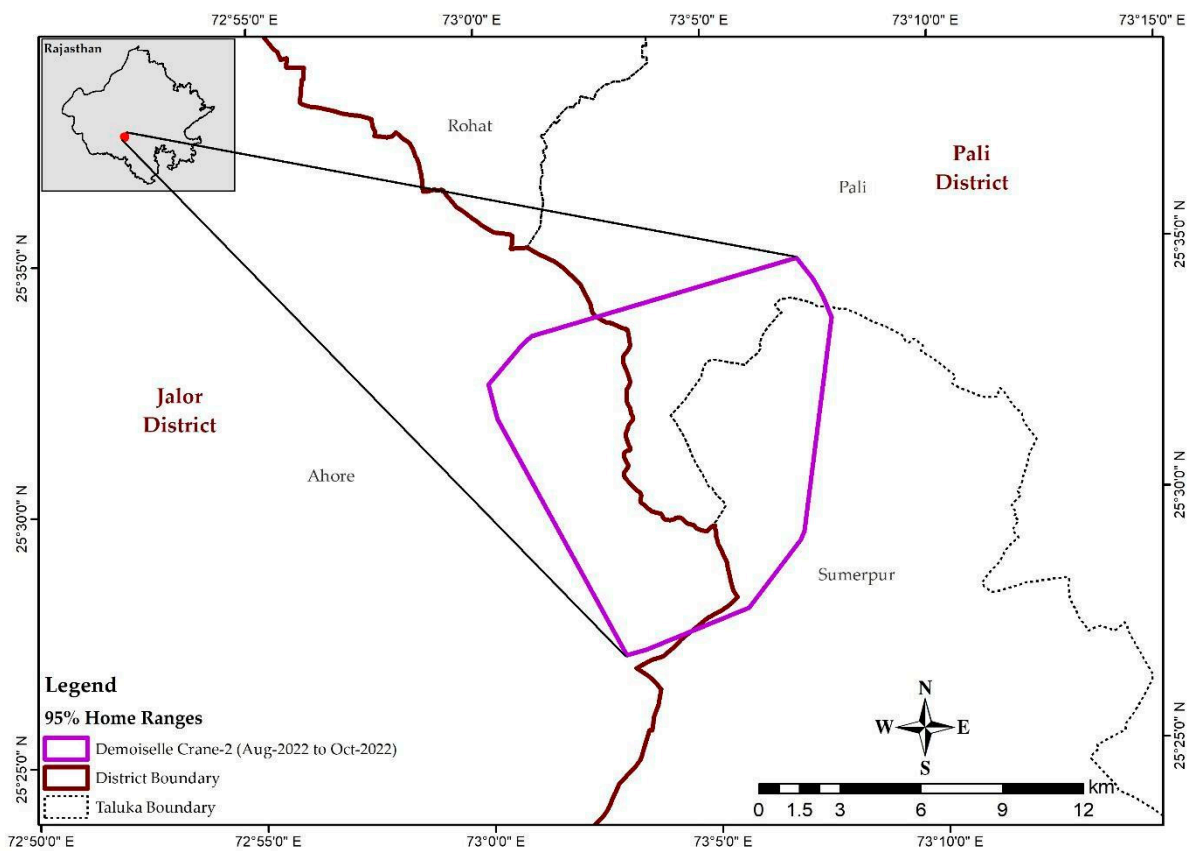

**Fig 7 Home range polygon of Demoiselle Crane-2 calculated between August 2022 to October 2022 in Jalor and Pali districts of the northwestern state of Rajasthan, India**



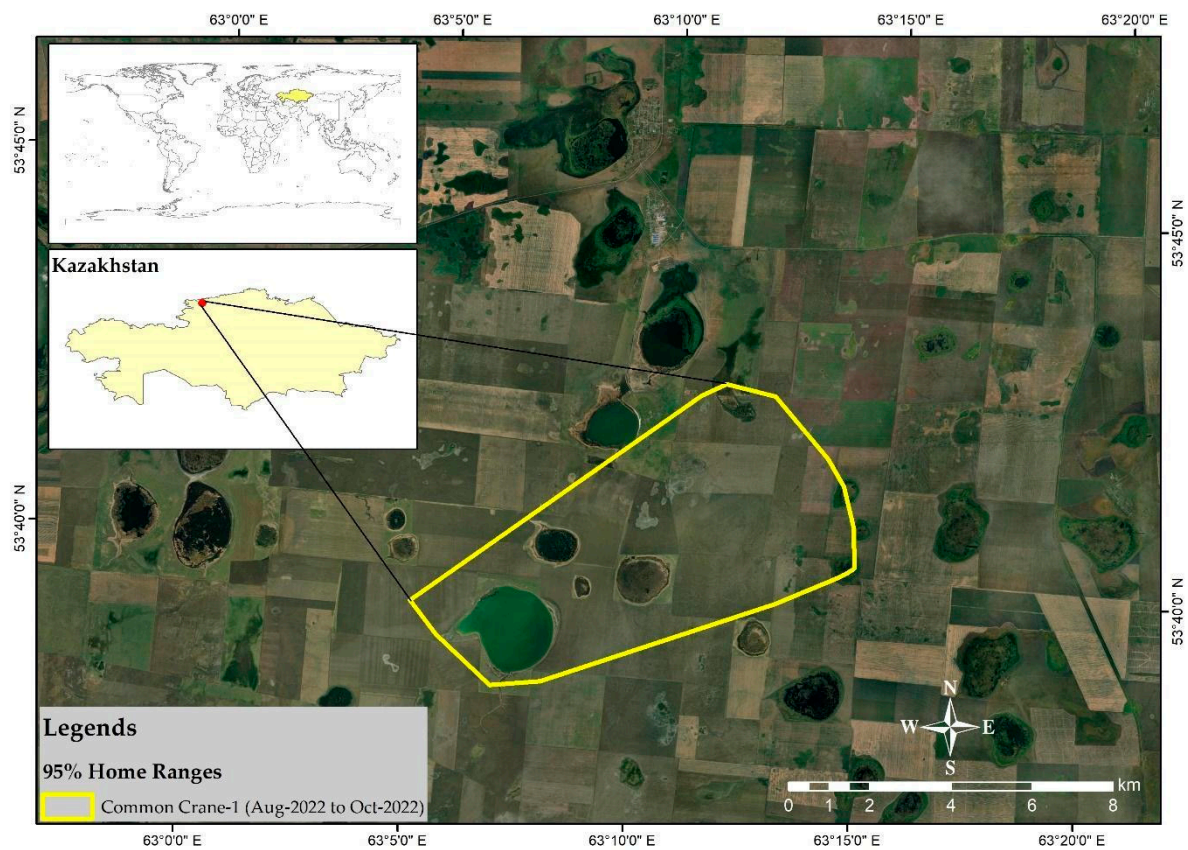

**Fig 8 Home range polygon of Common Crane-2 calculated between August 2022 to October 2022 in northern Kazakhstan.**



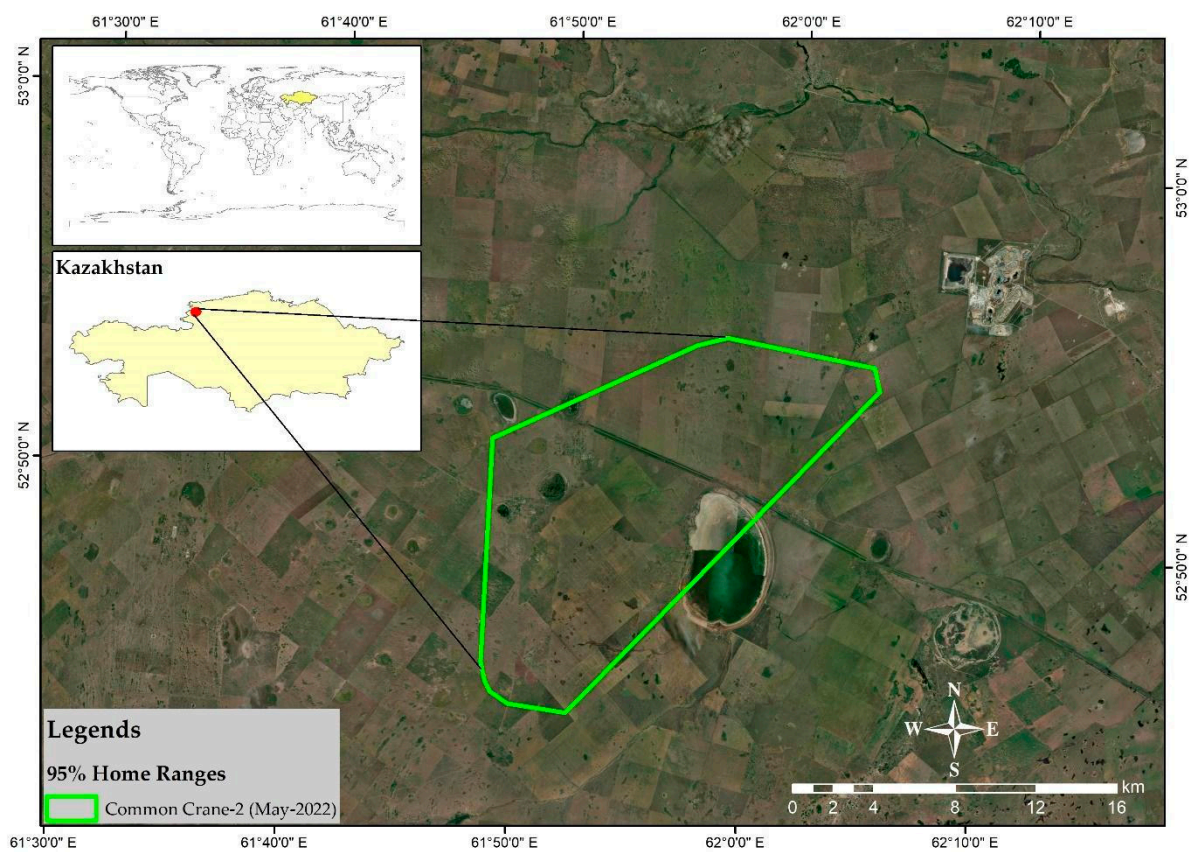

***Fig 9 Home range polygon of Common Crane-2 calculated in May 2022 in northern Kazakhstan.***

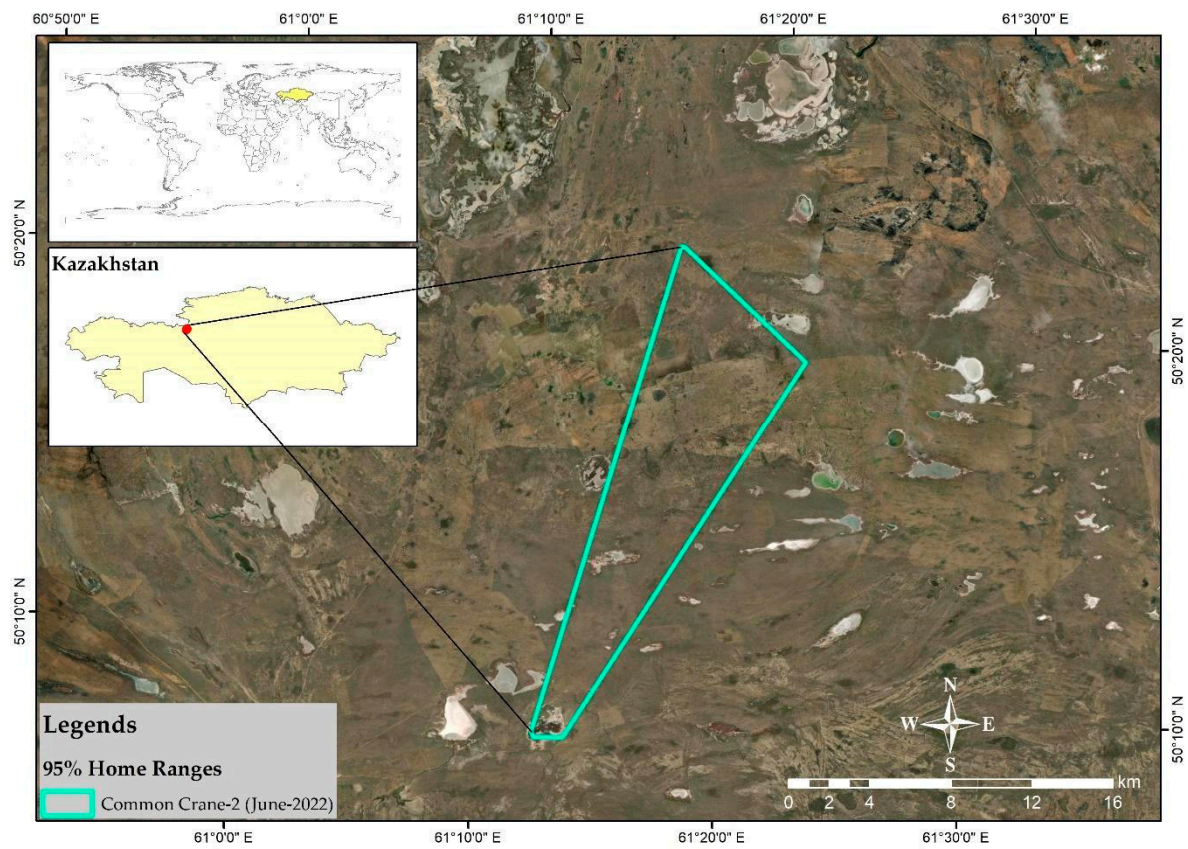

**Fig 10 Home range polygon of Common Crane-2 calculated in June 2022 in northern Kazakhstan.**



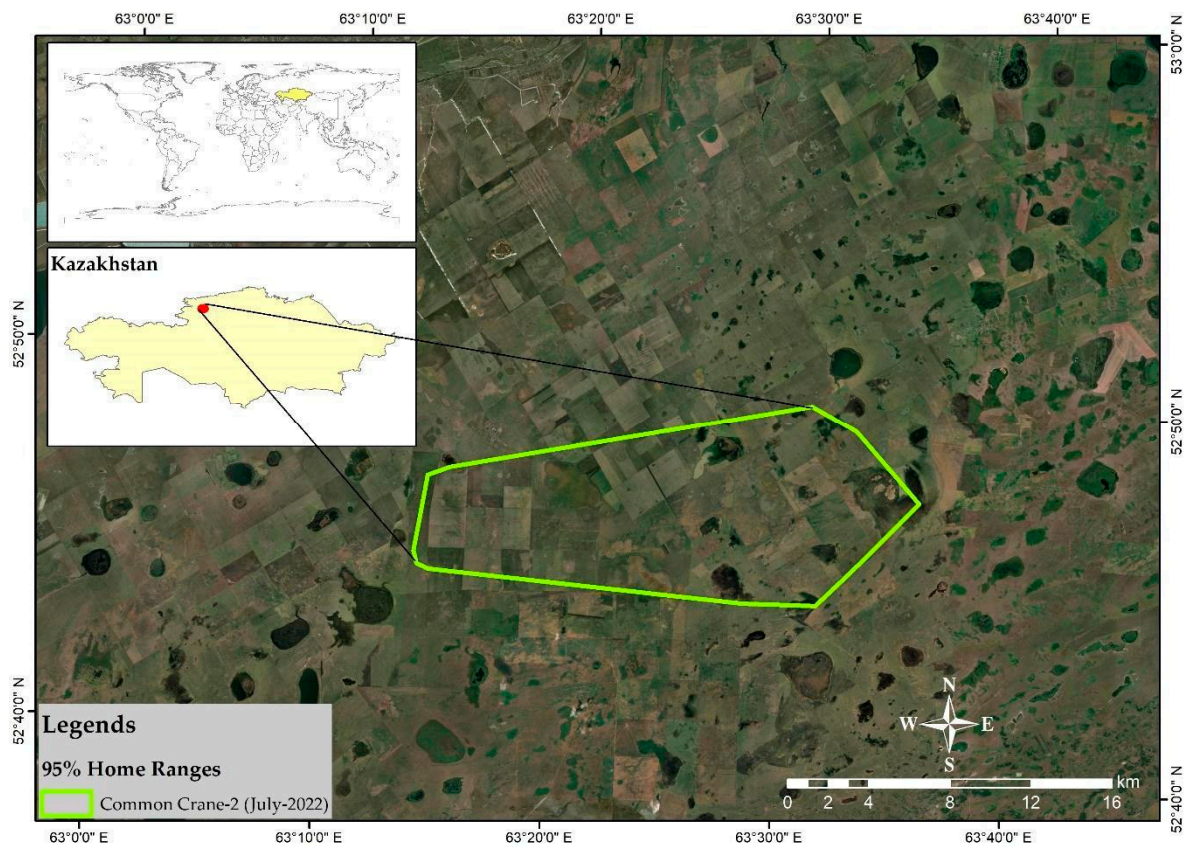

***Fig 11 Home range polygon of Common Crane-2 calculated in July 2022 in northern Kazakhstan.***

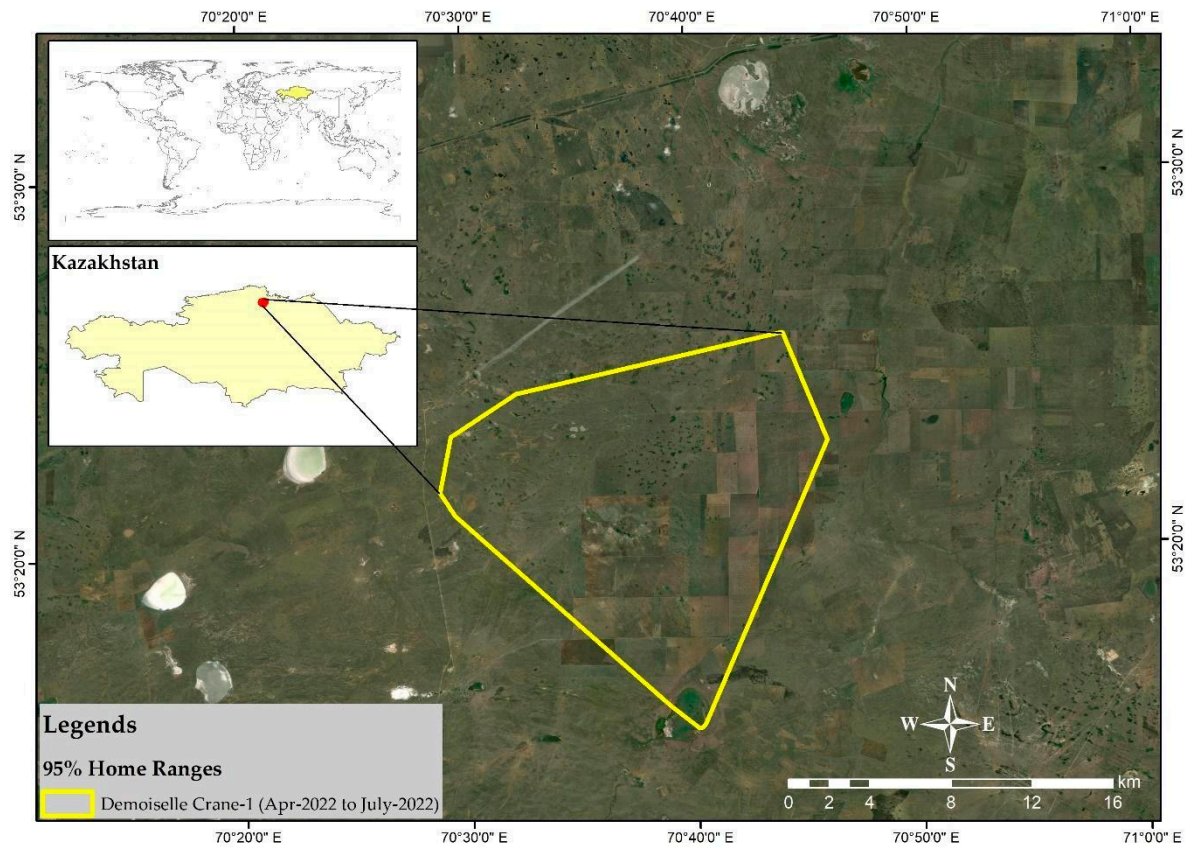

**Fig 12 Home range polygon of Demoiselle Crane-1 calculated between April 2022 to July 2022 in northern Kazakhstan.**

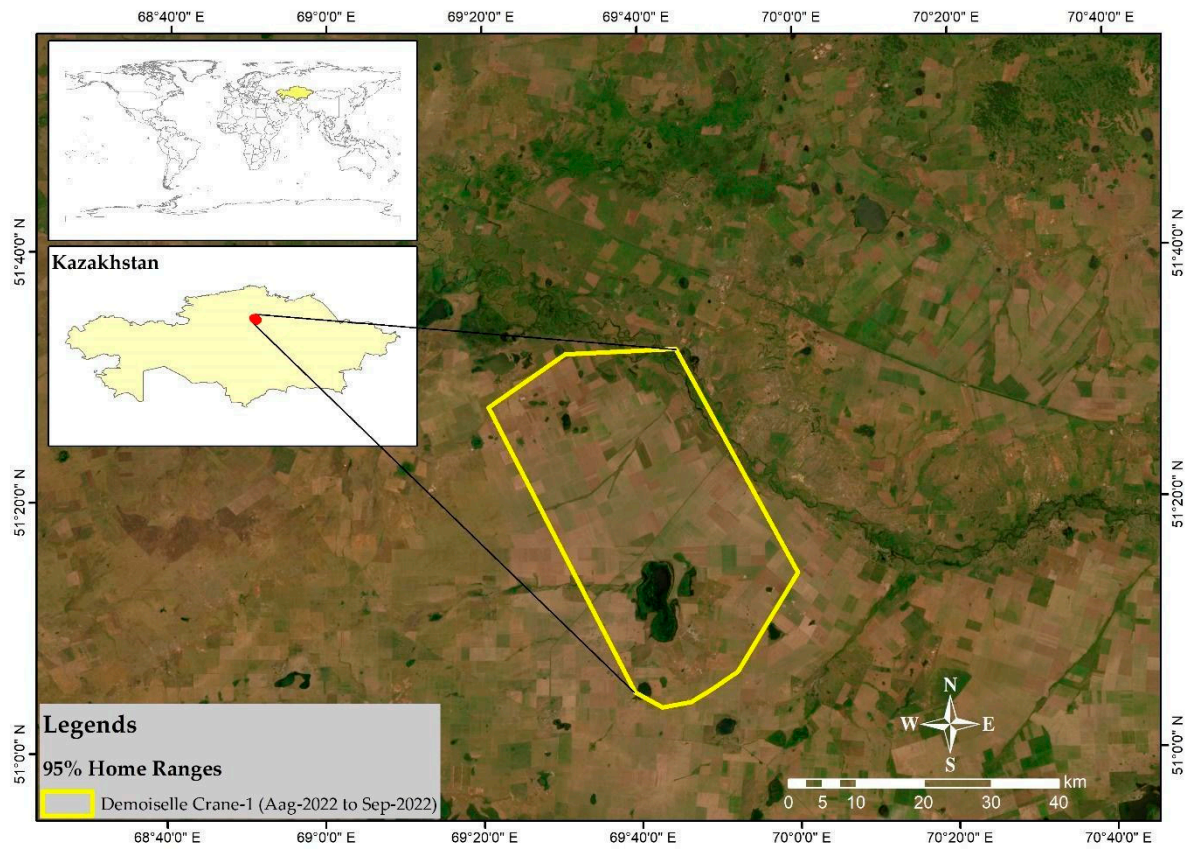

**Fig 13 Home range polygon of Demoiselle Crane-1 calculated between August 2022 to September 2022 in northern Kazakhstan.**



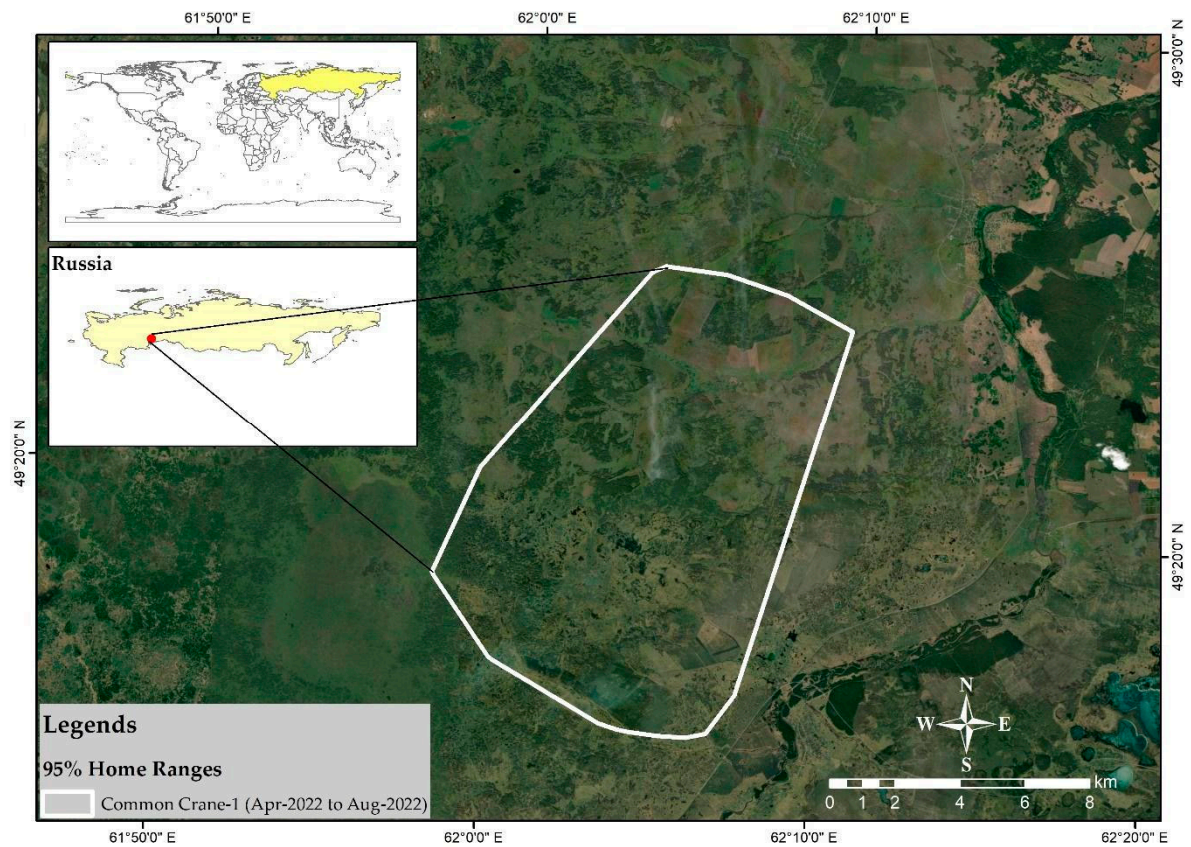

***Fig 13 Home range polygon of Common Crane-1 calculated between April 2022 to August 2022 in Russia.***
