# Supplementary material
Source: MDPI journal article supplement (https://www.mdpi.com/2673-6004/4/4/29)
Supplement: s1 [file s1]

**Supplementary Information S5: Details of the stopover locations used by Common Cranes and Demoiselle Cranes during migration**

| Sr. No.                                                         | Bird ID No.                      | Country      | State/Province*            | District**       | Sub-district/Taluka*** | Village | Days spent at Stopovers | Month-Year   |
|-----------------------------------------------------------------|----------------------------------|--------------|----------------------------|------------------|------------------------|---------|-------------------------|--------------|
| 1                                                               | Common Crane-1 (India to Russia) | India        | Gujarat                    | Jamnagar         | Jamnagar               | Sachana | 1                       | March 2022   |
| 2                                                               |                                  | Pakistan     | Sindh                      | Tharparkar       | Diplo                  |         | 1                       | March 2022   |
| 3                                                               |                                  | Pakistan     | Sindh                      | Nawabshah        | Sarkhand               |         | 1                       | March 2022   |
| 4                                                               |                                  | Pakistan     | Balochistan                | Chagai           | Dalbadin               |         | 1                       | March 2022   |
| 5                                                               |                                  | Afghanistan  | Helmand                    | Nawa-I-Barakzayi |                        |         | 1                       | March 2022   |
| 6                                                               |                                  | Iran         | Razavi Khorasan            | Torbat-e-jam     | Buzhgan                |         | 1                       | March 2022   |
| 7                                                               |                                  | Turkmenistan | Ahal                       | Tejen            |                        |         | 3                       | April 2022   |
| 8                                                               |                                  | Turkmenistan | Dasoguz                    | Gubadag          |                        |         | 1                       | April 2022   |
| 9                                                               |                                  | Kazakhstan   | Aktobe Region              | Shalkar          |                        |         | 2                       | April 2022   |
| 10                                                              |                                  | Kazakhstan   | Aktobe Region              | Ayteke Bi        |                        |         | 3                       | April 2022   |
| 11                                                              |                                  | Kazakhstan   | Kostanay Region            | Kamystinskiy     |                        |         | 2                       | April 2022   |
| 12                                                              |                                  | Kazakhstan   | Kostanay Region            | Karabalykskiy    |                        |         | 1                       | April 2022   |
| 13                                                              |                                  | Russia       | Chelyabinsk Oblast         |                  |                        |         | 1                       | April 2022   |
|                                                                 | Total                            | 7            | 10                         | 13               | 6                      | 2       | 19                      | 2            |
| Common Crane-1 settled in Kurgan Oblast in Russia in April 2022 |                                  |              |                            |                  |                        |         |                         |              |
| 14                                                              | Common Crane-1 (Russia to India) | Kazakhstan   | Kostanay Region            | Fyodorovski      |                        |         | 12                      | August 2022  |
| 15                                                              |                                  | Kazakhstan   | Aktobe Region              | Irgizskiy        |                        |         | 1                       | October 2022 |
| 16                                                              |                                  | Kazakhstan   | Kyzylorda Region           | Aral'skiy        |                        |         | 1                       | October 2022 |
| 17                                                              |                                  | Uzbekistan   | Republic of Karakalpakstan | Muynak/Moynaq    |                        |         | 3                       | October 2022 |
| 18                                                              |                                  | Turkmenistan | Balkan                     | Magtymguly       |                        |         | 1                       | October 2022 |
| 19                                                              |                                  | Turkmenistan | Ahal                       | Baherden         |                        |         | 2                       | October 2022 |
| 20                                                              |                                  | Turkmenistan | Ahal                       | Gokdepe          |                        |         | 1                       | October 2022 |

| Sr. No.                                                                                       | Bird ID No.                             | Country      | State/Province*            | District**      | Sub-district/Taluka*** | Village        | Days spent at Stopovers | Month-Year   |
|-----------------------------------------------------------------------------------------------|-----------------------------------------|--------------|----------------------------|-----------------|------------------------|----------------|-------------------------|--------------|
| 21                                                                                            |                                         | Iran         | Razavi Khorasan            | Sarakhs         |                        |                | 1                       | October 2022 |
| 22                                                                                            |                                         | Afghanistan  | Herat                      | Ghoryan         |                        |                | 1                       | October 2022 |
| 23                                                                                            |                                         | Afghanistan  | Nimruz                     | Chakhansur      |                        |                | 1                       | October 2022 |
| 24                                                                                            |                                         | Pakistan     | Balochistan                | Kharan          |                        |                | 1                       | October 2022 |
| 25                                                                                            |                                         | Pakistan     | Sindh                      | Jamshoro        |                        |                | 1                       | October 2022 |
| 26                                                                                            |                                         | India        | Gujarat                    | Kutch           | Lakhpat                | Kharai         | 1                       | October 2022 |
| 27                                                                                            |                                         | India        | Gujarat                    | Kutch           | Abdasa                 | Karamta        | 1                       | October 2022 |
| 28                                                                                            |                                         | India        | Gujarat                    | Kutch           | Abdasa                 | Rampar-Chadura | 1                       | October 2022 |
| 29                                                                                            |                                         | India        | Gujarat                    | Kutch           | Mandvi                 | Tragadi        | 1                       | October 2022 |
|                                                                                               | <b>Total</b>                            | <b>8</b>     | <b>13</b>                  | <b>13</b>       | <b>4</b>               | <b>4</b>       | <b>30</b>               | <b>3</b>     |
| <b>Common Crane-1 settled near Kaj in Junagadh district of Gujarat, India in October 2022</b> |                                         |              |                            |                 |                        |                |                         |              |
| 31                                                                                            | Common Crane-2<br>(India to Kazakhstan) | India        | Gujarat                    | Jamnagar        | Jamnagar               | Sachana        | 1                       | April 2022   |
| 32                                                                                            |                                         | Pakistan     | Sindh                      | Tharparkar      | Diplo                  |                | 1                       | April 2022   |
| 33                                                                                            |                                         | Pakistan     | Sindh                      | Dadu            | Johi                   |                | 1                       | April 2022   |
| 34                                                                                            |                                         | Pakistan     | Balochistan                | Kharan          | Kharan                 |                | 1                       | April 2022   |
| 35                                                                                            |                                         | Afghanistan  | Nimruz                     | Khash Rod       |                        |                | 1                       | April 2022   |
| 36                                                                                            |                                         | Iran         | Razavi Khorasan            | Sarakhs         | Marzadaran             |                | 1                       | April 2022   |
| 37                                                                                            |                                         | Turkmenistan | Ahal                       | Ak Bugday       |                        |                | 1                       | April 2022   |
| 38                                                                                            |                                         | Turkmenistan | Dasoguz                    | GurbansoltanEje |                        |                | 1                       | April 2022   |
| 39                                                                                            |                                         | Uzbekistan   | Republic of Karakalpakstan | Muynak/Moynaq   |                        |                | 1                       | April 2022   |
| 40                                                                                            |                                         | Kazakhstan   | Kyzylorda Region           | Kazalinskiy     |                        |                | 18                      | April 2022   |
| 41                                                                                            |                                         | Kazakhstan   | Aktobe Region              | Irgizskiy       |                        |                | 1                       | April 2022   |
| 42                                                                                            |                                         | Kazakhstan   | Kostanay Region            | Taranovskiy     |                        |                | 3                       | April 2022   |

| Sr. No.                                                    | Bird ID No.                             | Country      | State/Province*  | District**    | Sub-district/Taluka*** | Village                | Days spent at Stopovers | Month-Year     |
|------------------------------------------------------------|-----------------------------------------|--------------|------------------|---------------|------------------------|------------------------|-------------------------|----------------|
|                                                            | <b>Total</b>                            | <b>7</b>     | <b>11</b>        | <b>12</b>     | <b>5</b>               | <b>1</b>               | <b>31</b>               | <b>1</b>       |
| <b>Common Crane-2 settled in Denisovskiy in April 2022</b> |                                         |              |                  |               |                        |                        |                         |                |
| 43                                                         | Common Crane-2<br>(Kazakhstan to India) | Kazakhstan   | Kostanay Region  | Mendykarskiy  |                        |                        | 1                       | September 2022 |
| 44                                                         |                                         | Kazakhstan   | Kostanay Region  | Kamystinskiy  |                        |                        | 1                       | September 2022 |
| 45                                                         |                                         | Kazakhstan   | Aktobe Region    | Aytekebiyskiy |                        |                        | 1                       | October 2022   |
| 46                                                         |                                         | Kazakhstan   | Kyzylorda Region | Aral'skiy     |                        |                        | 1                       | October 2022   |
| 47                                                         |                                         | Turkmenistan | Dasoguz          | Gubadag       |                        |                        | 1                       | October 2022   |
| 48                                                         |                                         | Turkmenistan | Ahal             | Ak Bugday     |                        |                        | 1                       | October 2022   |
| 49                                                         |                                         | Turkmenistan | Ahal             | Kaka          |                        |                        | 1                       | October 2022   |
| 50                                                         |                                         | Afghanistan  | Herat            | Ghoryan       |                        |                        | 1                       | October 2022   |
| 51                                                         |                                         | Afghanistan  | Helmand          | Dishu         |                        |                        | 1                       | October 2022   |
| 52                                                         |                                         | Pakistan     | Kharan           | Kharan        |                        |                        | 1                       | October 2022   |
| 53                                                         |                                         | Pakistan     | Lasbela          | Durji         |                        |                        | 1                       | October 2022   |
| 54                                                         |                                         | India        | Gujarat          | Kutch         | Greater Rann of Kutch  |                        | 1                       | October 2022   |
| 55                                                         |                                         | India        | Gujarat          | Kutch         | Bhuj                   | Banni                  | 2                       | October 2022   |
| 56                                                         |                                         | India        | Gujarat          | Kutch         | Bhuj                   | Banni                  | 3                       | October 2022   |
| 57                                                         |                                         | India        | Gujarat          | Kutch         | Bhuj                   | Berdo                  | 5                       | October 2022   |
| 58                                                         |                                         | India        | Gujarat          | Kutch         | Greater Rann of Kutch  | Vanoi                  | 1                       | October 2022   |
| 59                                                         |                                         | India        | Gujarat          | Kutch         | Rapar                  | Jatavada-Gedi-Fategadh | 3                       | October 2022   |

| Sr. No.                                                      | Bird ID No.                              | Country    | State/Province*         | District**              | Sub-district/Taluka*** | Village            | Days spent at Stopovers | Month-Year   |
|--------------------------------------------------------------|------------------------------------------|------------|-------------------------|-------------------------|------------------------|--------------------|-------------------------|--------------|
| 60                                                           |                                          | India      | Gujarat                 | Jamnagar                | Dhrol                  | Dedakdad           | 2                       | October 2022 |
| 61                                                           |                                          | India      | Gujarat                 | Rajkot                  | Padadhari              | Bodighodi-Paddhari | 1                       | October 2022 |
| 62                                                           |                                          | India      | Gujarat                 | Junagadh                | Kodinar                | Chikhli            | 1                       | October 2022 |
|                                                              | <b>Total</b>                             | <b>5</b>   | <b>10</b>               | <b>15</b>               | <b>6</b>               | <b>7</b>           | <b>30</b>               | <b>2</b>     |
| <b>Common Crane-2 settled in Kaj/Nanavad in October 2022</b> |                                          |            |                         |                         |                        |                    |                         |              |
| 63                                                           | Demoiselle Crane-1 (India to Kazakhstan) | India      | Gujarat                 | Porbandar               | Porbandar              | Baradiya           | 1                       | March 2022   |
| 64                                                           |                                          | India      | Gujarat                 | Jamnagar                | Jamnagar               | Sachana            | 1                       | March 2022   |
| 65                                                           |                                          | India      | Gujarat                 | Jamnagar                | Jodiya                 | Hadiyana           | 1                       | March 2022   |
| 66                                                           |                                          | India      | Gujarat                 | Kutch                   | Greater Rann of Kutch  |                    | 1                       | March 2022   |
| 67                                                           |                                          | Pakistan   | Punjab                  | Dera Ghazi Khan         |                        |                    | 1                       | March 2022   |
| 68                                                           |                                          | Uzbekistan | Qashqadaryo Region      | Chirakchi               |                        |                    | 1                       | March 2022   |
| 69                                                           |                                          | Uzbekistan | Jizzakh Region          | Farish                  |                        |                    | 2                       | April 2022   |
| 70                                                           |                                          | Kazakhstan | South Kazakhstan Region | Otrarskiy               |                        |                    | 1                       | April 2022   |
| 71                                                           |                                          | Kazakhstan | Jambyl Region           | Zhualynskiy             |                        |                    | 7                       | April 2022   |
| 72                                                           |                                          | Kazakhstan | South Kazakhstan Region | Suzakskiy               |                        |                    | 1                       | April 2022   |
| 73                                                           |                                          | Kazakhstan | Akmola Region           | Zharkainskiy            |                        |                    | 1                       | April 2022   |
|                                                              |                                          | Kazakhstan | Akmola Region           | Atbasarskiy-Zhaksynskiy |                        |                    | 2                       | April 2022   |
| 74                                                           |                                          | Kazakhstan | Akmola Region           | Shuchinskiy             |                        |                    | 1                       | April 2022   |
|                                                              | <b>Total</b>                             | <b>4</b>   | <b>8</b>                | <b>13</b>               | <b>4</b>               | <b>3</b>           | <b>21</b>               | <b>2</b>     |
| <b>Demoiselle Crane-1 settled in April 2022</b>              |                                          |            |                         |                         |                        |                    |                         |              |

| Sr. No. | Bird ID No.                                 | Country    | State/Province*         | District**      | Sub-district/Taluka*** | Village                 | Days spent at Stopovers | Month-Year     |
|---------|---------------------------------------------|------------|-------------------------|-----------------|------------------------|-------------------------|-------------------------|----------------|
|         | Demoiselle Crane-1<br>(Kazakhstan to India) | Kazakhstan | South Kazakhstan Region | Suzakskiy       |                        |                         | 1                       | September 2022 |
| 75      |                                             | India      | Rajasthan               | Jaisalmer       | Jaisalmer              | Kabeer basti            | 1                       | September 2022 |
|         |                                             | India      | Rajasthan               | Jaisalmer       | Fatehgarh              | Sirwa                   | 1                       | September 2022 |
|         |                                             | India      | Rajasthan               | Barmer          | Sheo                   | ChakNegarda             | 1                       | September 2022 |
| 76      |                                             | India      | Rajasthan               | Barmer          | Pachpadra              | Balotra                 | 1                       | September 2022 |
| 77      |                                             | India      | Rajasthan               | Pali            | Rohat                  | DungarPur               | 1                       | September 2022 |
|         |                                             | India      | Rajasthan               | Nagaur          | Merta                  | Lai-Gangardi-Gangarda   | 8                       | September 2022 |
|         |                                             | India      | Rajasthan               | Pali            | Sojat                  | Sobrawas                | 1                       | September 2022 |
|         |                                             | India      | Rajasthan               | Nagaur          | Didwana                | Thanu                   | 1                       | October 2022   |
|         |                                             | India      | Rajasthan               | Nagaur          | Didwana                | Doodoli                 | 1                       | November 2022  |
| 78      |                                             | India      | Rajasthan               | Jodhpur         | Bilara                 | BasniKaparda            | 1                       | November 2022  |
| 79      |                                             | India      | Rajasthan               | Jodhpur         | Pipar Shahar           | Jatiyawas               | 1                       | November 2022  |
|         |                                             | India      | Gujarat                 | Kutch           | Bhachau                | Great Rann of Kutch     | 1                       | November 2022  |
| 80      |                                             | India      | Gujarat                 | Jamnagar        | Jodiya                 | Hadiyana-Rampar-Jambuda | 2                       | November 2022  |
|         |                                             | India      | Gujarat                 | Devbhumi Dwarka | Bhanvad                | Chokhanda               | 1                       | November 2022  |

| Sr. No.                                                                                      | Bird ID No.                              | Country      | State/Province*  | District**    | Sub-district/Taluka*** | Village                  | Days spent at Stopovers | Month-Year   |
|----------------------------------------------------------------------------------------------|------------------------------------------|--------------|------------------|---------------|------------------------|--------------------------|-------------------------|--------------|
|                                                                                              | <b>Total</b>                             | <b>2</b>     | <b>3</b>         | <b>9</b>      | <b>13</b>              | <b>18</b>                | <b>23</b>               | <b>2</b>     |
| <b>Demoiselle Crane-1 settled in Porbandar District of Gujarat in India on November 2022</b> |                                          |              |                  |               |                        |                          |                         |              |
| 82                                                                                           | Demoiselle Crane-2 (India to Kazakhstan) | India        | Gujarat          | Kutch         | Bhachau                | Little Rann of Kutch     | 1                       | March 2022   |
| 83                                                                                           |                                          | India        | Rajasthan        | Barmer        | Gadraroad              | Kumbharon Ki Dhani-Magra | 1                       | March 2022   |
|                                                                                              |                                          | India        | Rajasthan        | Barmer        | Gadraroad              | Bahla                    | 1                       | March 2022   |
| 84                                                                                           |                                          | Uzbekistan   | Jizzakh Region   | Farish        |                        |                          | 2                       | March 2022   |
| 85                                                                                           |                                          | Kazakhstan   | Kyzylorda Region | Shieliyskiy   |                        |                          | 2                       | April 2022   |
| 86                                                                                           |                                          | Kazakhstan   | Kyzylorda Region | Terenozekskiy |                        |                          | 9                       | April 2022   |
|                                                                                              |                                          | Kazakhstan   | Kyzylorda Region | Zhalagashskiy |                        |                          | 1                       | April 2022   |
| 87                                                                                           |                                          | Kazakhstan   | Aktobe Region    | Irgizskiy     |                        |                          | 2                       | April 2022   |
| 88                                                                                           |                                          | Kazakhstan   | Aktobe Region    | Aytekebiyskiy |                        |                          | 1                       | April 2022   |
|                                                                                              | <b>Total</b>                             | <b>3</b>     | <b>5</b>         | <b>8</b>      | <b>2</b>               | <b>4</b>                 | <b>20</b>               | <b>2</b>     |
| <b>Demoiselle Crane-2 settled in Kazakhstan in April 2022</b>                                |                                          |              |                  |               |                        |                          |                         |              |
| 89                                                                                           | Demoiselle Crane-2 (Kazakhstan to India) | Kazakhstan   | Kostanay Region  | Kamystinskiy  |                        |                          | 1                       | August 2022  |
| 90                                                                                           |                                          | Kazakhstan   | Kyzylorda Region | Aral'skiy     |                        |                          | 1                       | August 2022  |
| 91                                                                                           |                                          | Uzbekistan   | Navoiy Region    | Uchkuduk      |                        |                          | 1                       | August 2022  |
| 92                                                                                           |                                          | Turkmenistan | Lebap            | Halac         |                        |                          | 1                       | August 2022  |
| 93                                                                                           |                                          | Afghanistan  | Ghanzi           | Nawa          |                        |                          | 1                       | August 2022  |
| 94                                                                                           |                                          | Pakistan     | Balochistan      | Loralai       | Duki                   |                          | 1                       | August 2022  |
|                                                                                              |                                          | India        | Rajasthan        | Jodhpur       | Dechu                  | Dediya                   | 1                       | August 2022  |
|                                                                                              |                                          | India        | Rajasthan        | Pali          | Pali                   | GuraEndla                | 1                       | August 2022  |
| 95                                                                                           |                                          | India        | Gujarat          | Kutch         | Greater Rann of        |                          | 1                       | October 2022 |

| Sr. No. | Bird ID No. | Country | State/Province* | District**   | Sub-district/Taluka*** | Village         | Days spent at Stopovers | Month-Year    |
|---------|-------------|---------|-----------------|--------------|------------------------|-----------------|-------------------------|---------------|
|         |             |         |                 |              | Kutch                  |                 |                         |               |
|         |             | India   | Gujarat         | Banas Kantha | Suigam                 | Bharadava       | 1                       | October 2022  |
|         |             | India   | Gujarat         | Jamnagar     | Jamnagar               | Sachana-Jambuda | 1                       | October 2022  |
|         |             | India   | Gujarat         | Jamnagar     | Kalyanpur              | Khakharda       | 1                       | December 2022 |
| 96      |             | India   | Gujarat         | Jamnagar     | Kalyanpur              | Chachlana       | 1                       | December 2022 |
|         |             | India   | Gujarat         | Jamnagar     | Kalyanpur              | Bhatiya         | 1                       | December 2022 |
|         |             | India   | Gujarat         | Jamnagar     | Kalyanpur              | Gaga            | 1                       | December 2022 |
|         |             | India   | Gujarat         | Jamnagar     | Kalyanpur              | Nandana         | 1                       | December 2022 |
|         |             | India   | Gujarat         | Jamnagar     | Kalyanpur              | AsotaMota       | 1                       | December 2022 |
| 97      |             | India   | Gujarat         | Jamnagar     | Khambhaliya            | Beh             | 1                       | December 2022 |
|         |             | India   | Gujarat         | Jamnagar     | Lalpur                 | Singach         | 2                       | December 2022 |
|         |             | India   | Gujarat         | Jamnagar     | Khambhaliya            |                 | 1                       | December 2022 |
|         |             | India   | Gujarat         | Jamnagar     | Jamnagar               | Chela           | 1                       | December 2022 |
|         |             | India   | Gujarat         | Jamnagar     | Jamnagar               | Sachana         | 1                       | December 2022 |
| 98      |             | India   | Gujarat         | Jamnagar     | Jodiya                 | Hadiyana        | 1                       | December 2022 |
|         |             | India   | Gujarat         | Kutch        | Mundra                 | Ratadiya        | 1                       | December      |

| Sr. No.                                                                                                     | Bird ID No.  | Country  | State/Province* | District** | Sub-district/Taluka*** | Village   | Days spent at Stopovers | Month-Year |
|-------------------------------------------------------------------------------------------------------------|--------------|----------|-----------------|------------|------------------------|-----------|-------------------------|------------|
|                                                                                                             |              |          |                 |            |                        |           |                         | 2022       |
|                                                                                                             | <b>Total</b> | <b>6</b> | <b>8</b>        | <b>11</b>  | <b>10</b>              | <b>16</b> | <b>25</b>               | <b>3</b>   |
| <b>Demoiselle Crane-2 settled near saltpans of Jakhau, Abdasa taluka of Kutch, Gujarat in December-2022</b> |              |          |                 |            |                        |           |                         |            |

Yellow highlighted cells indicate missing data

\*indicates primary-level administrative units such as states and provinces.

\*\*indicates secondary-level administrative units such as districts.

\*\*\*indicates third-level administrative units such as tehsil.
