# Supplementary material
Source: MDPI journal article supplement (https://www.mdpi.com/2673-6004/4/4/29)
Supplement: s1 [file s1]

Archive with 8 entries (8 files):
- Supplementary Information S1 Tagging details.pdf
- Supplementary Information S2 Model matrices.pdf
- Supplementary Information S3 Home range polygons of Common and Demoiselle cranes in India and Kazakhstan.pdf
- Supplementary Information S4 Migration description.pdf
- Supplementary Information S5 Stopover locations.pdf
- Supplementary Information S6 Habitat map.pdf
- Supplementary Information S7 Fine scale habitat use details.pdf
- Supplementary Information S8 Partial dependence plots.pdf
